# Supplementary material for: Cryptic Distant Relatives Are Common in Both Isolated and Cosmopolitan Genetic Samples
Source: PubMed Central journal article supplement (PMC3317976; doi:10.1371/journal.pone.0034267), 2012-04-03

# Brahui 195

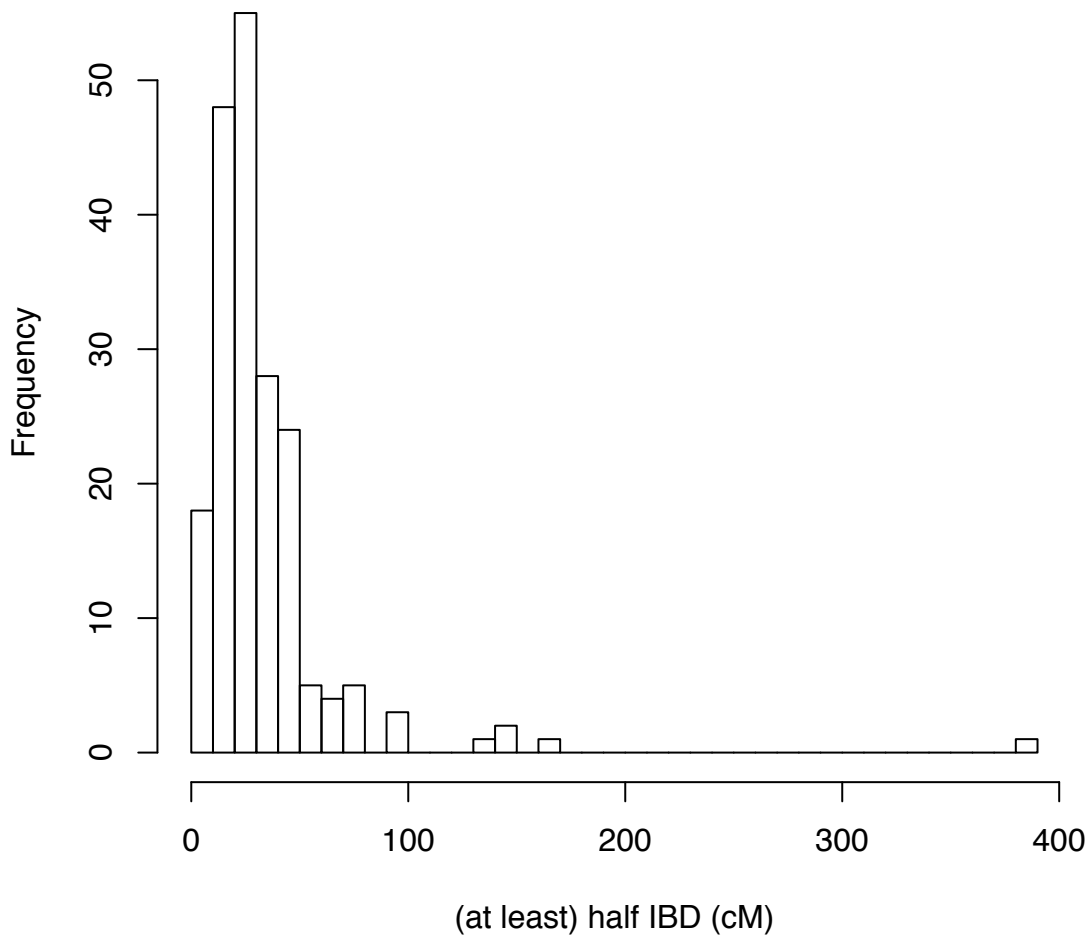

# Balochi 58

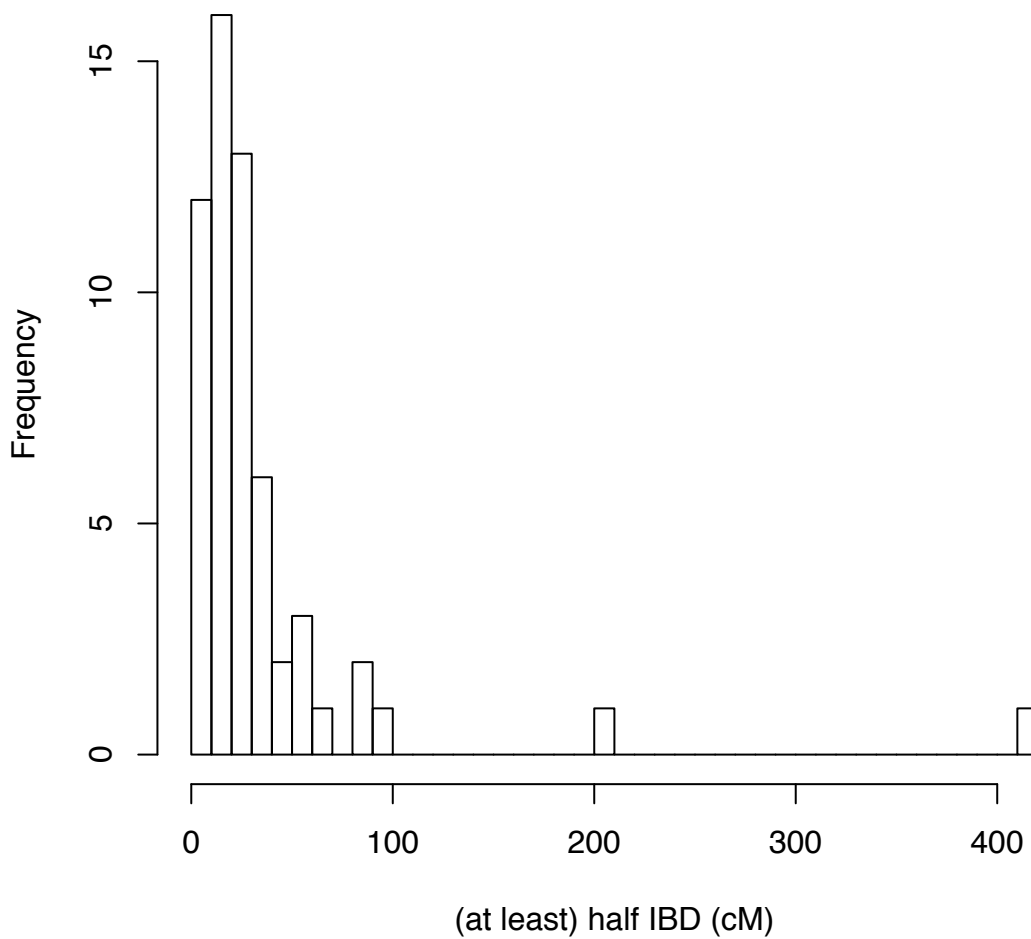

# Hazara 120

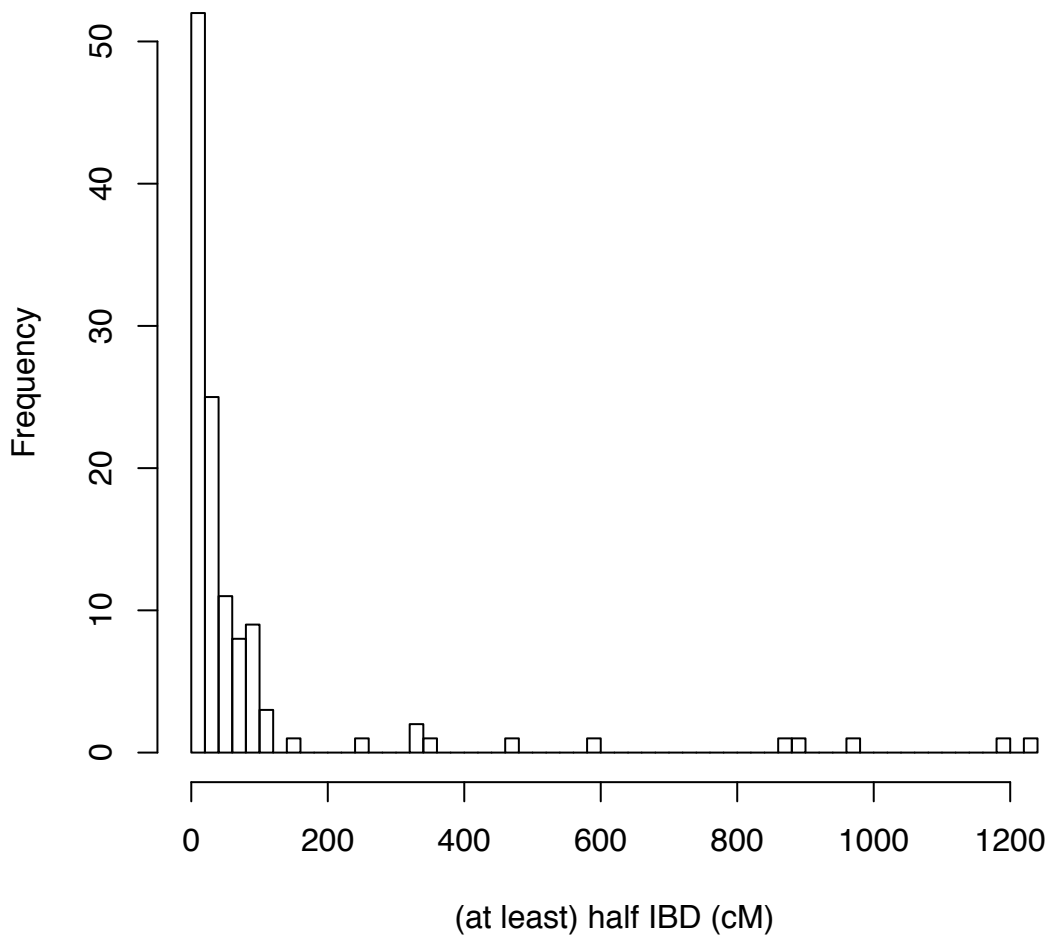

# Makrani 77

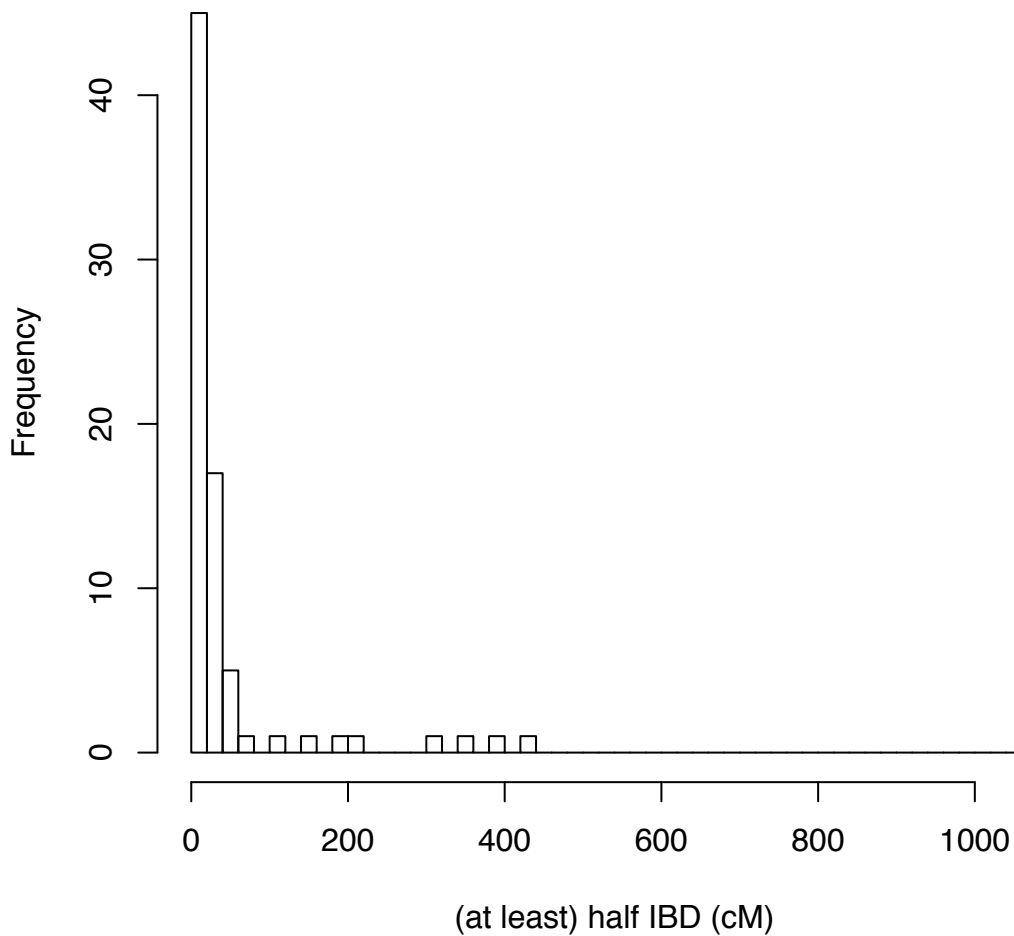

# Sindhi 17

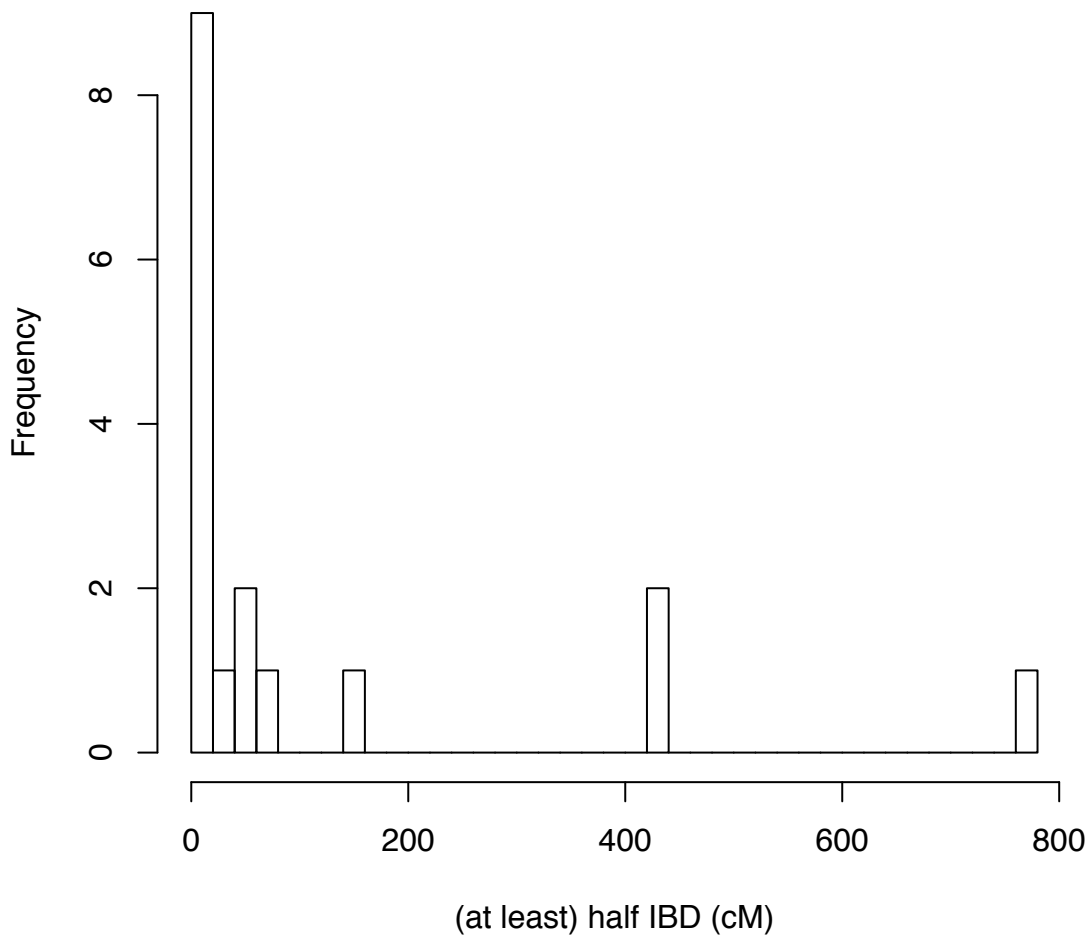

# Pathan 31

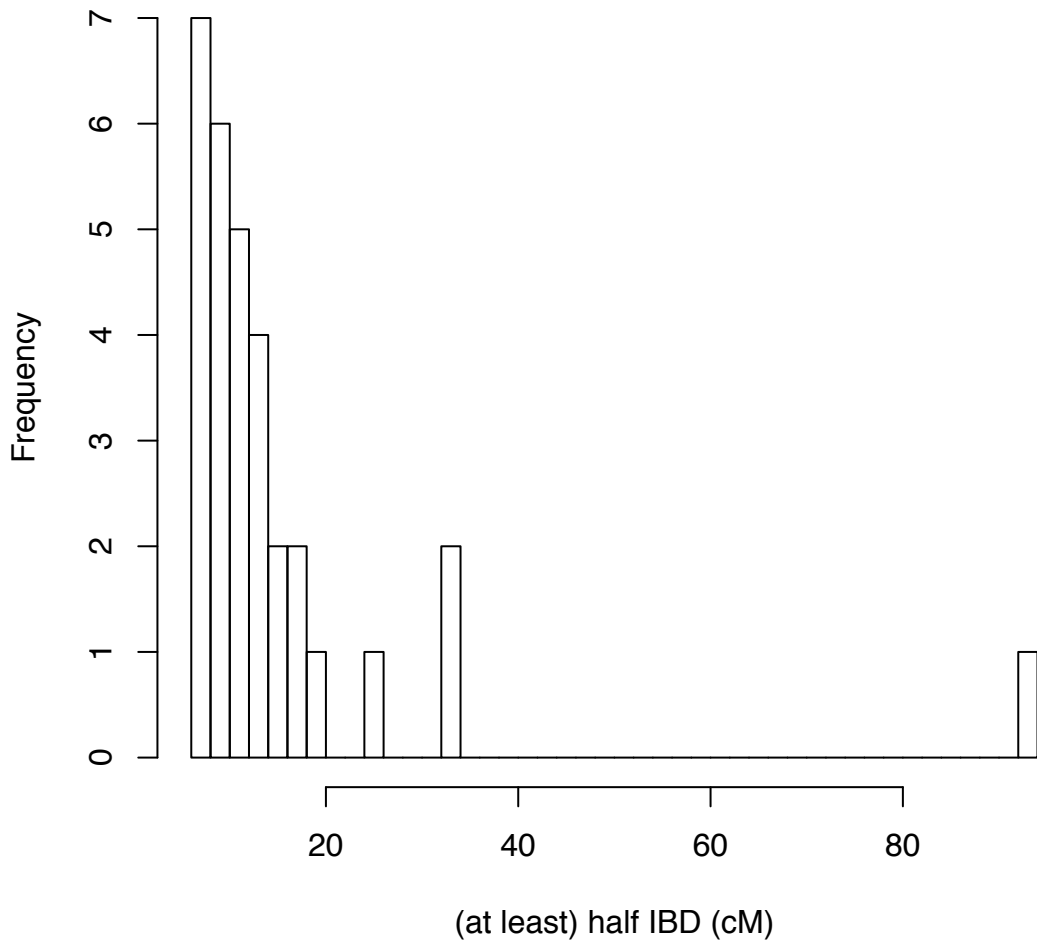

# Kalash 253

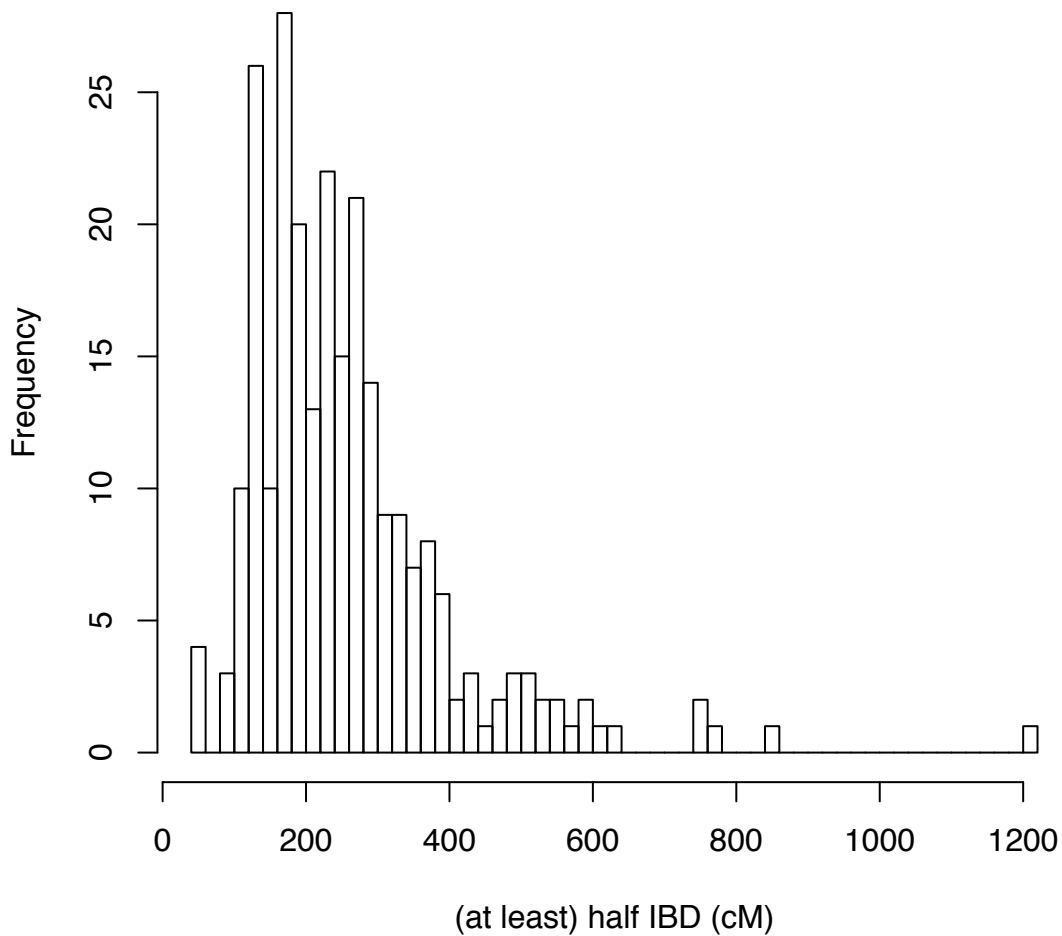

# Burusho 259

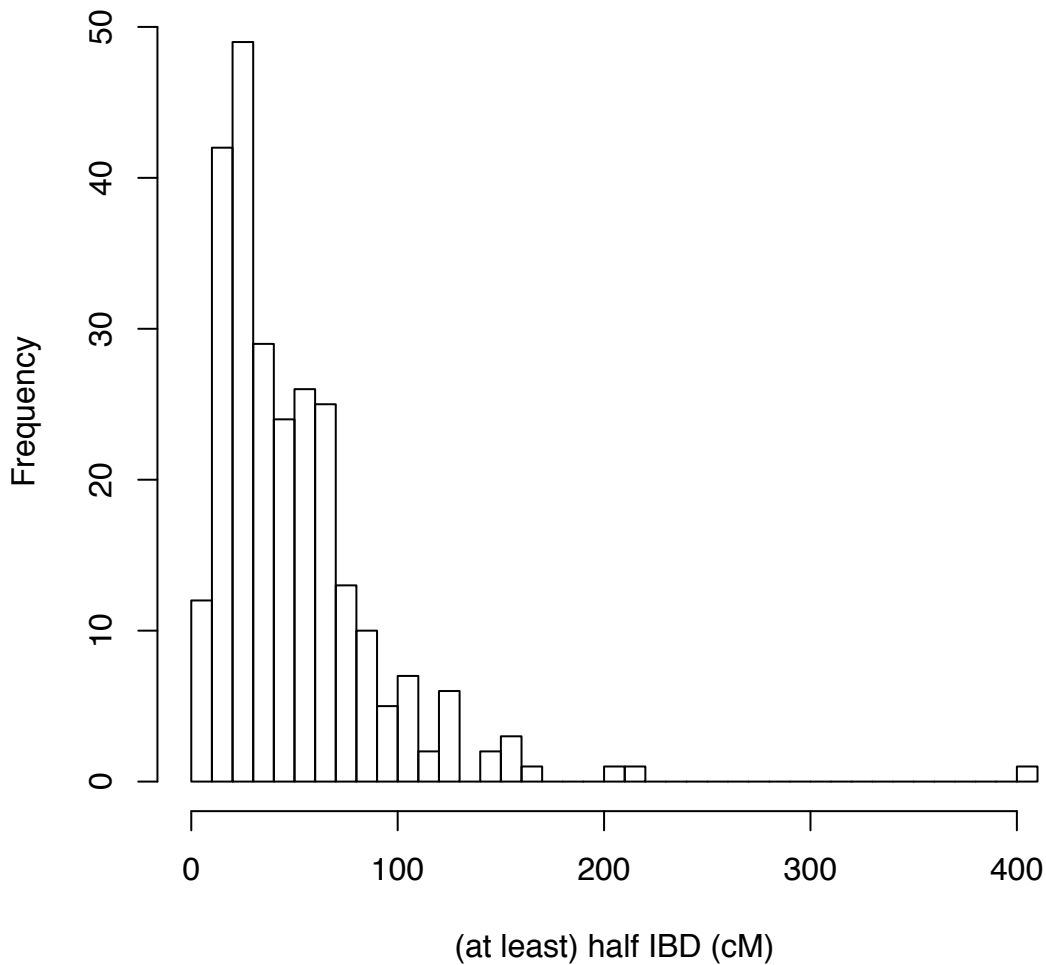



# Mbuti Pygmies 73

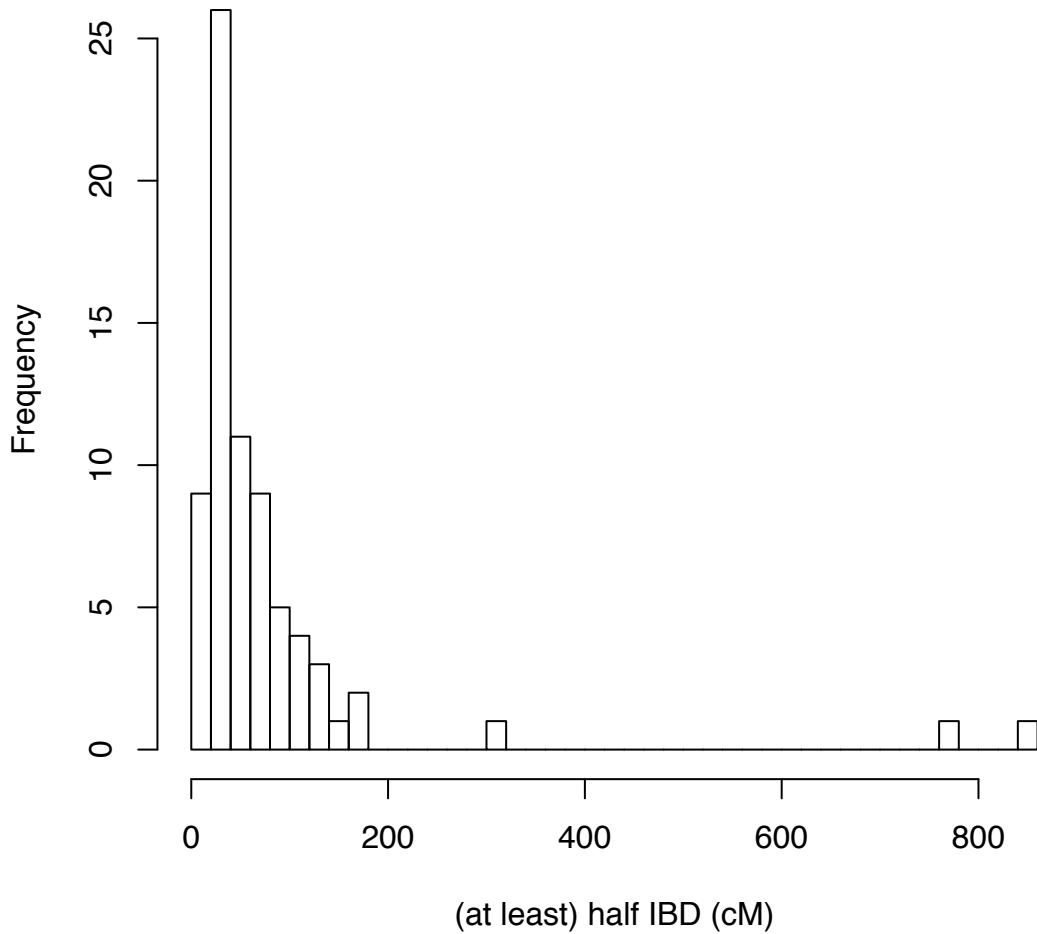

# Biaka Pygmies 202

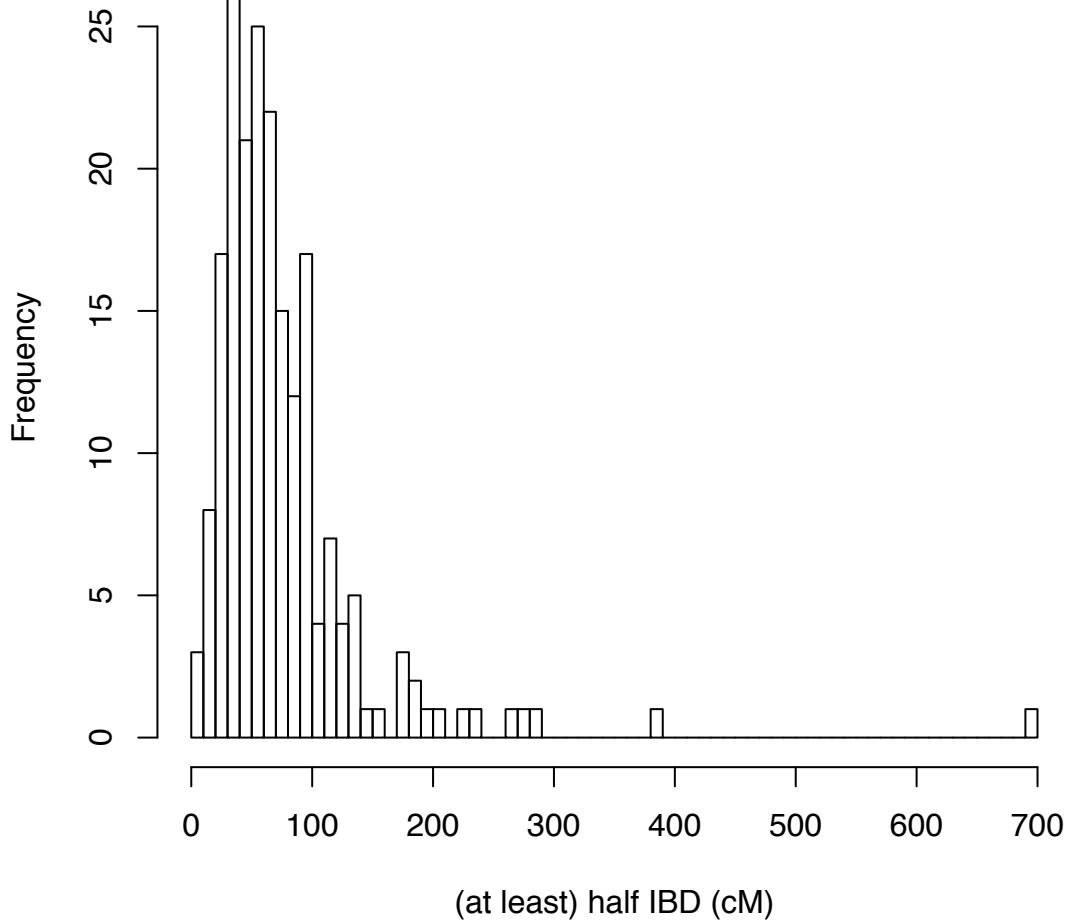

# NAN Melanesian 43

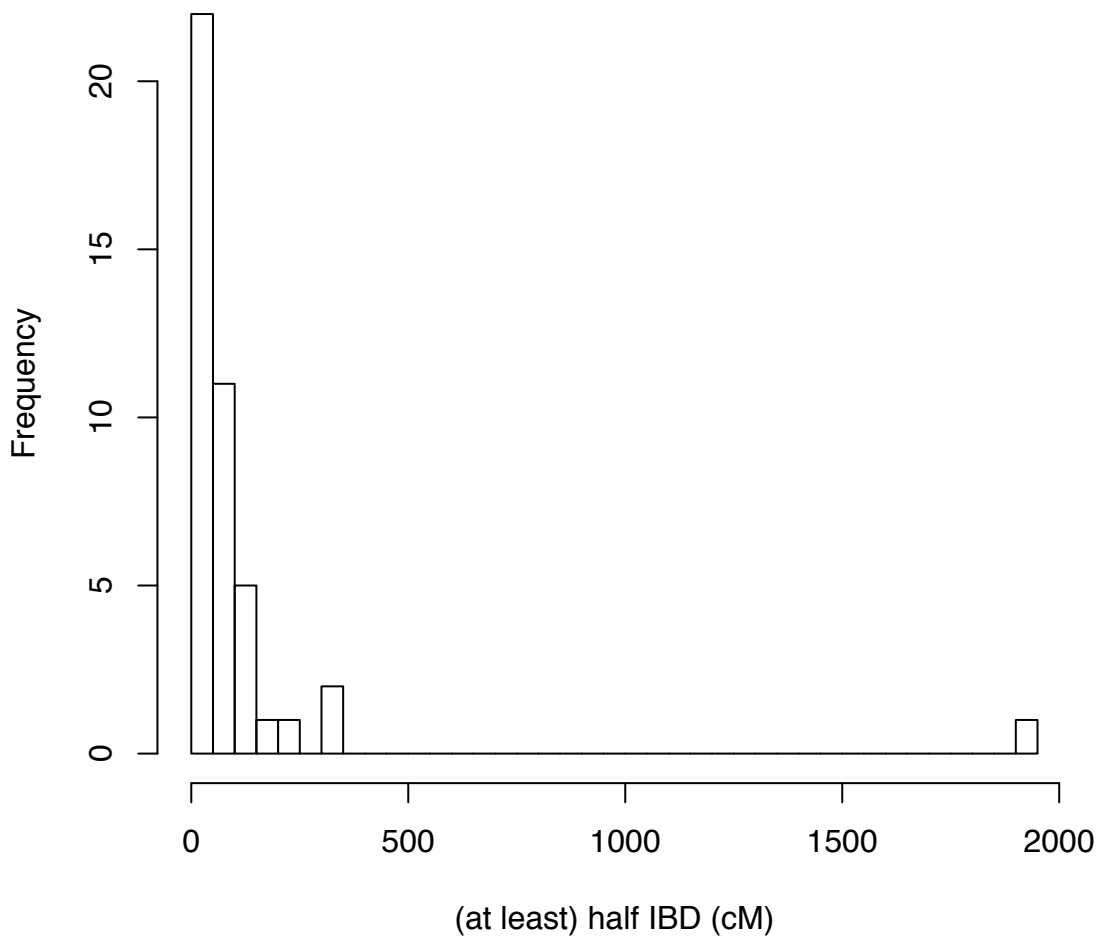

# Papuan 36

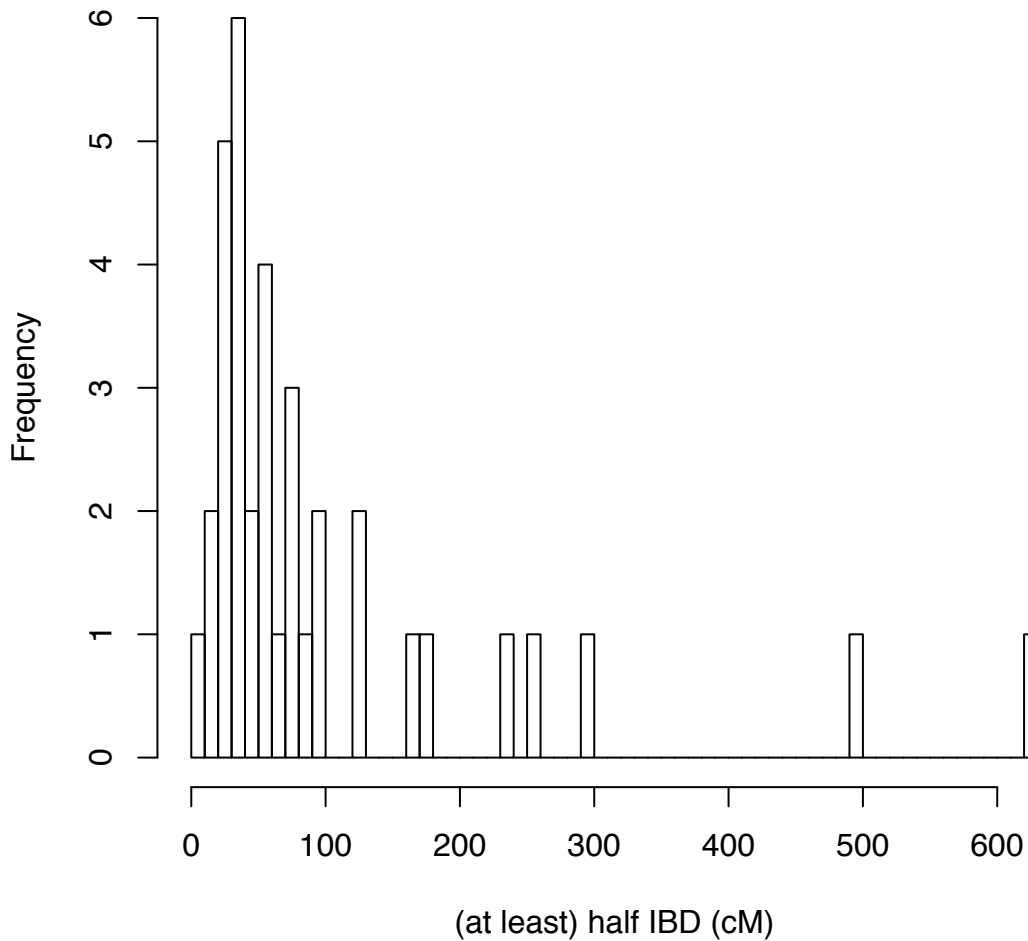

# Druze 630

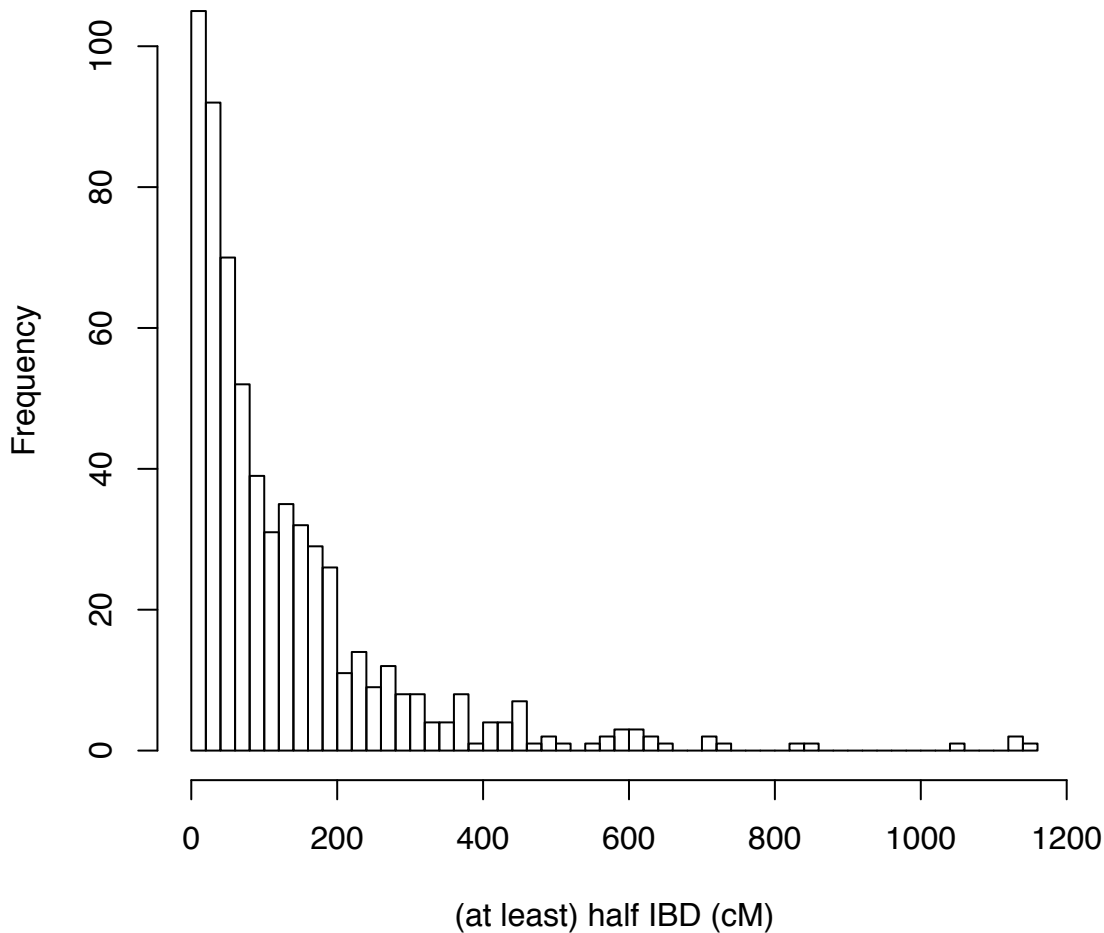

# Bedouin 323

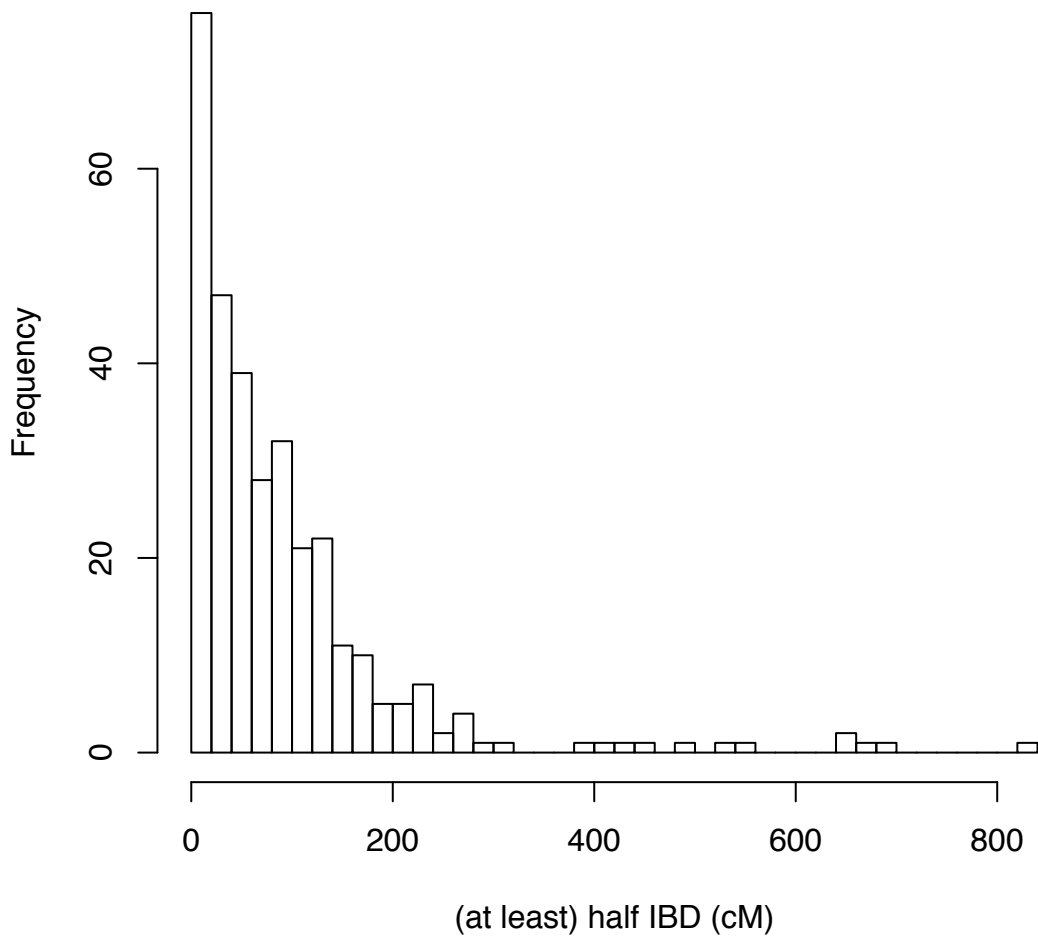

# Sardinian 143

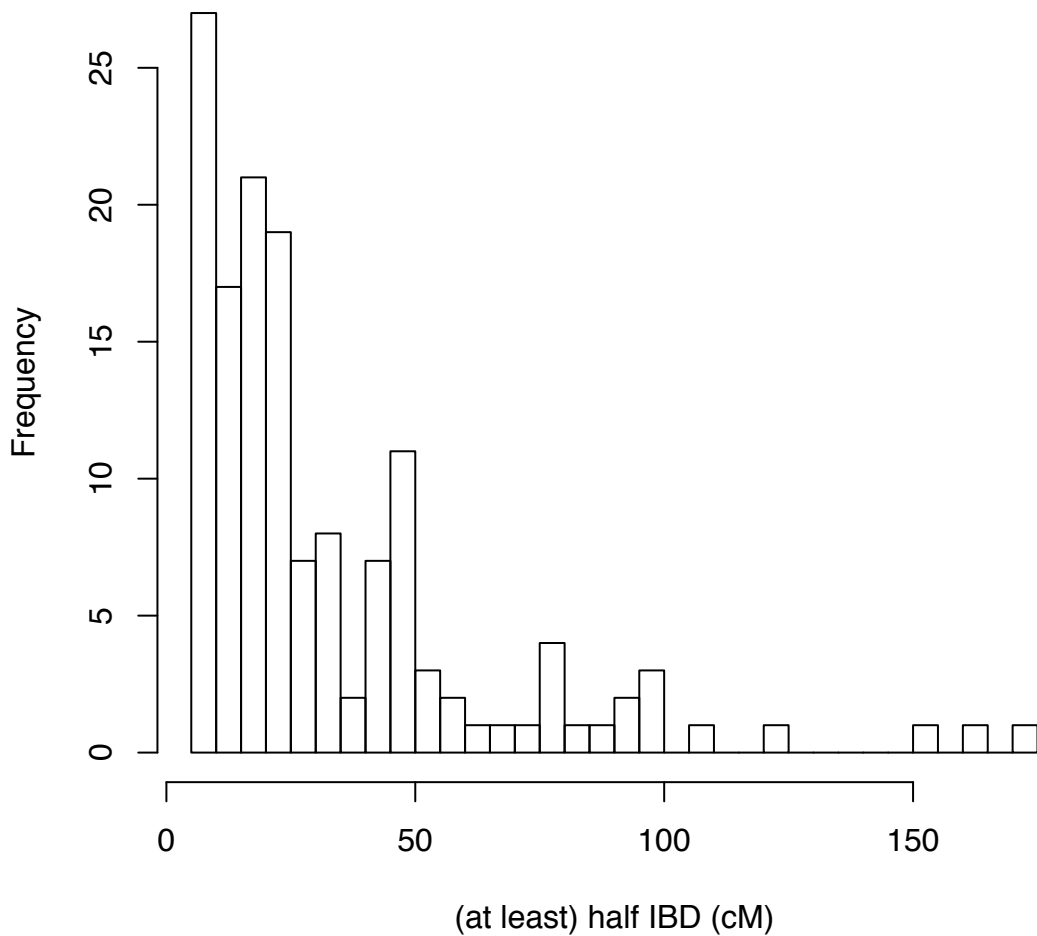

# Palestinian 646

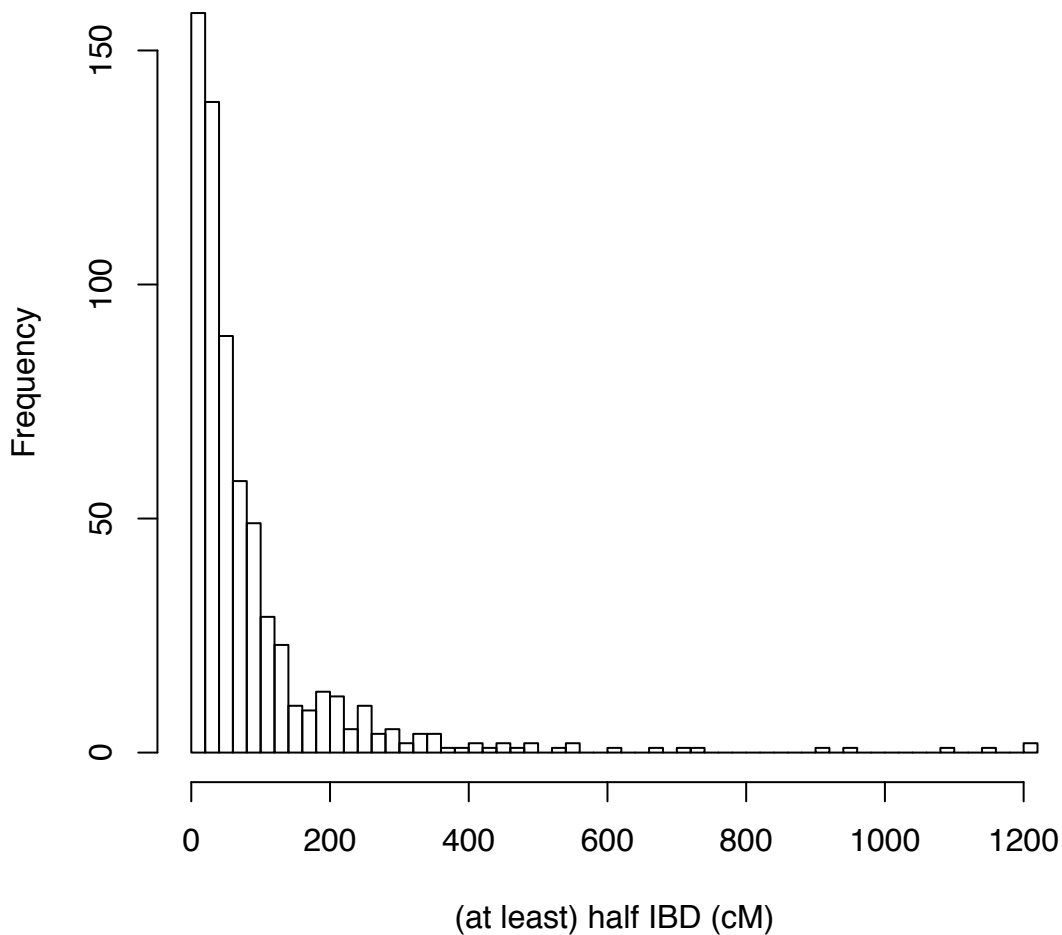



# Colombian 21

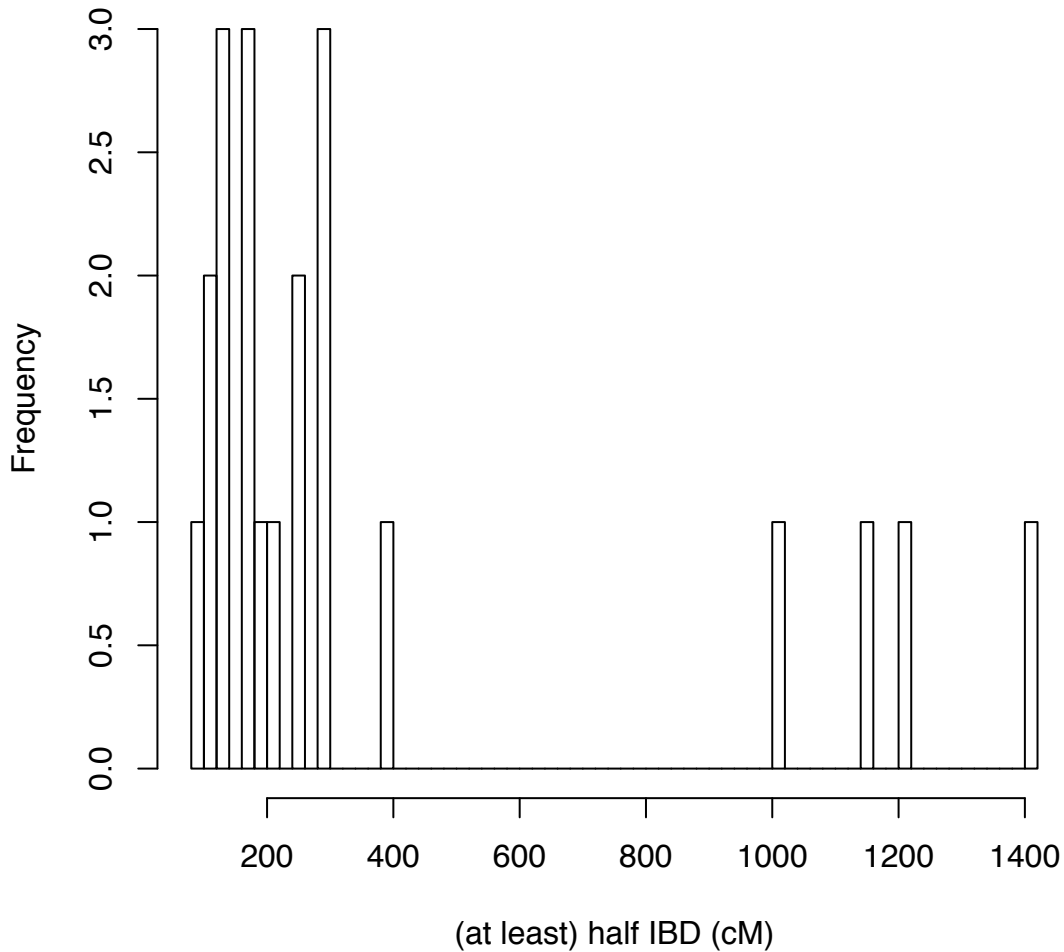

## Cambodian 2

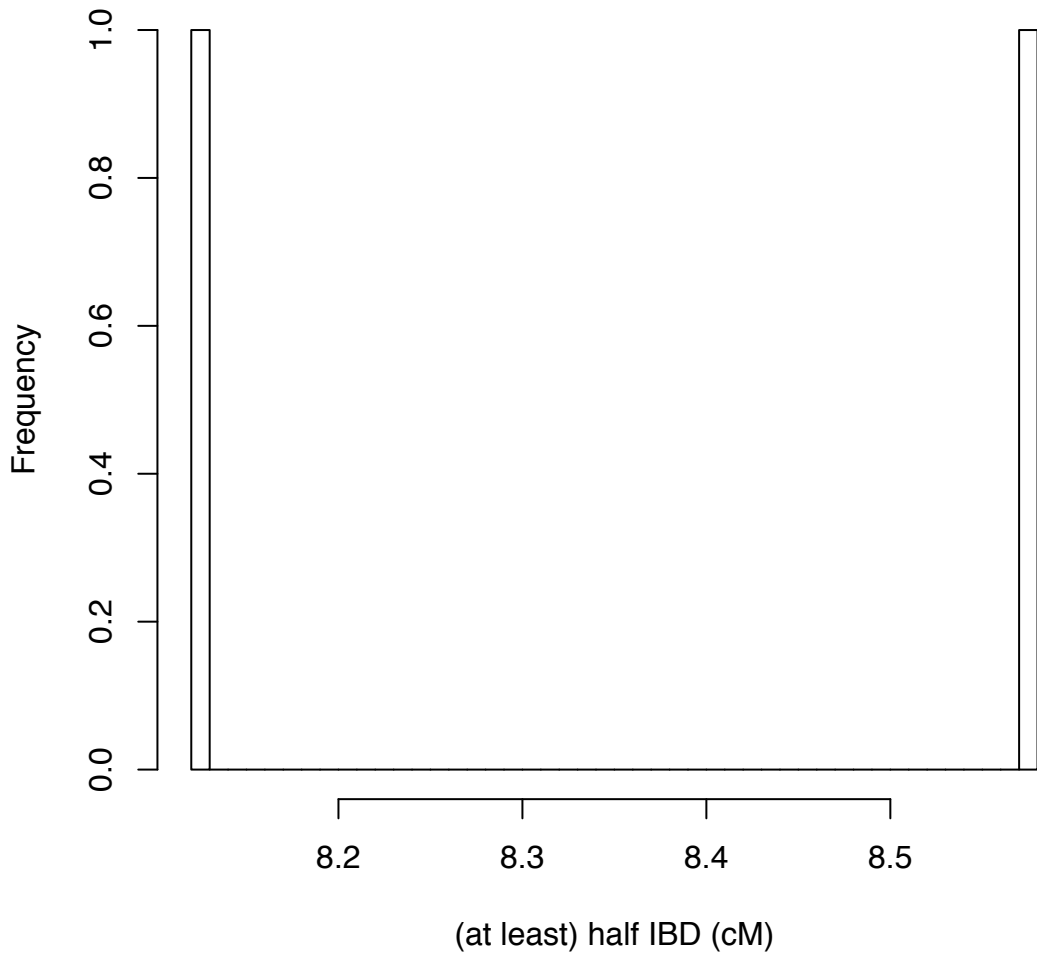

# Japanese 7

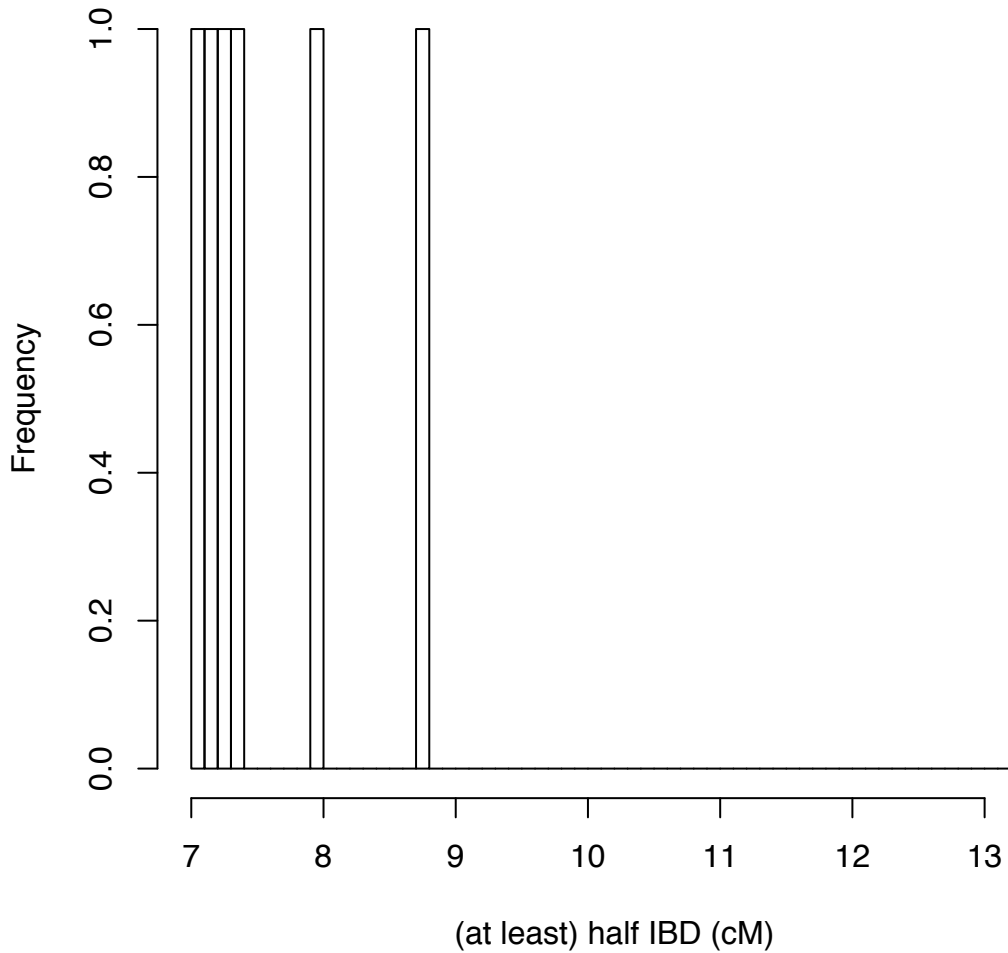

# Han 13

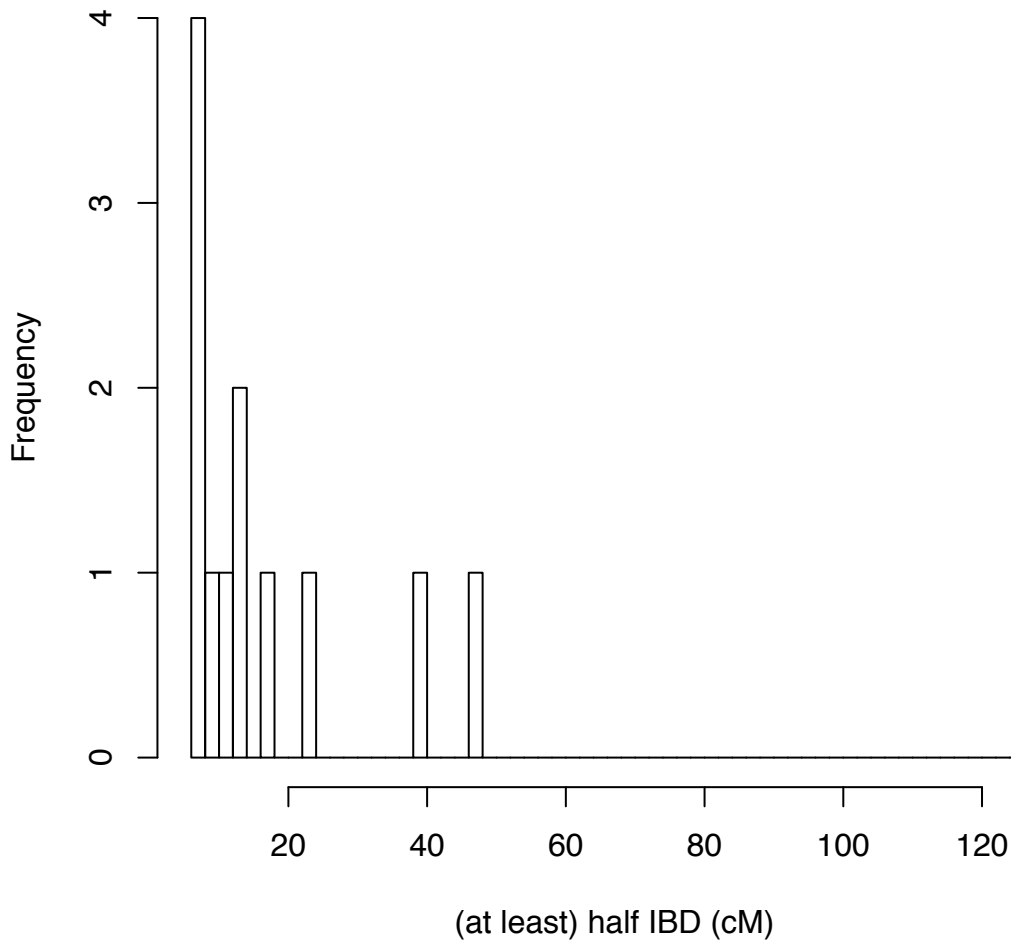

# Orcadian 71

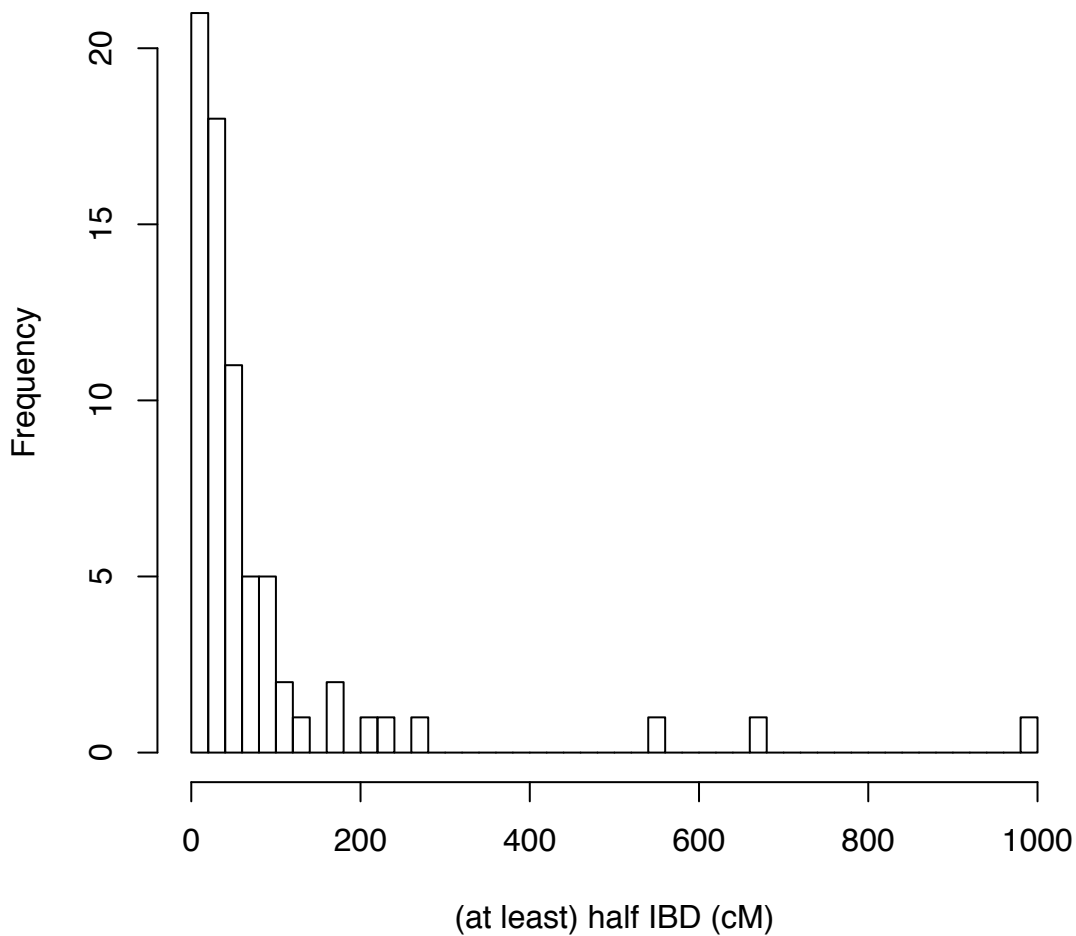

# Surui 28

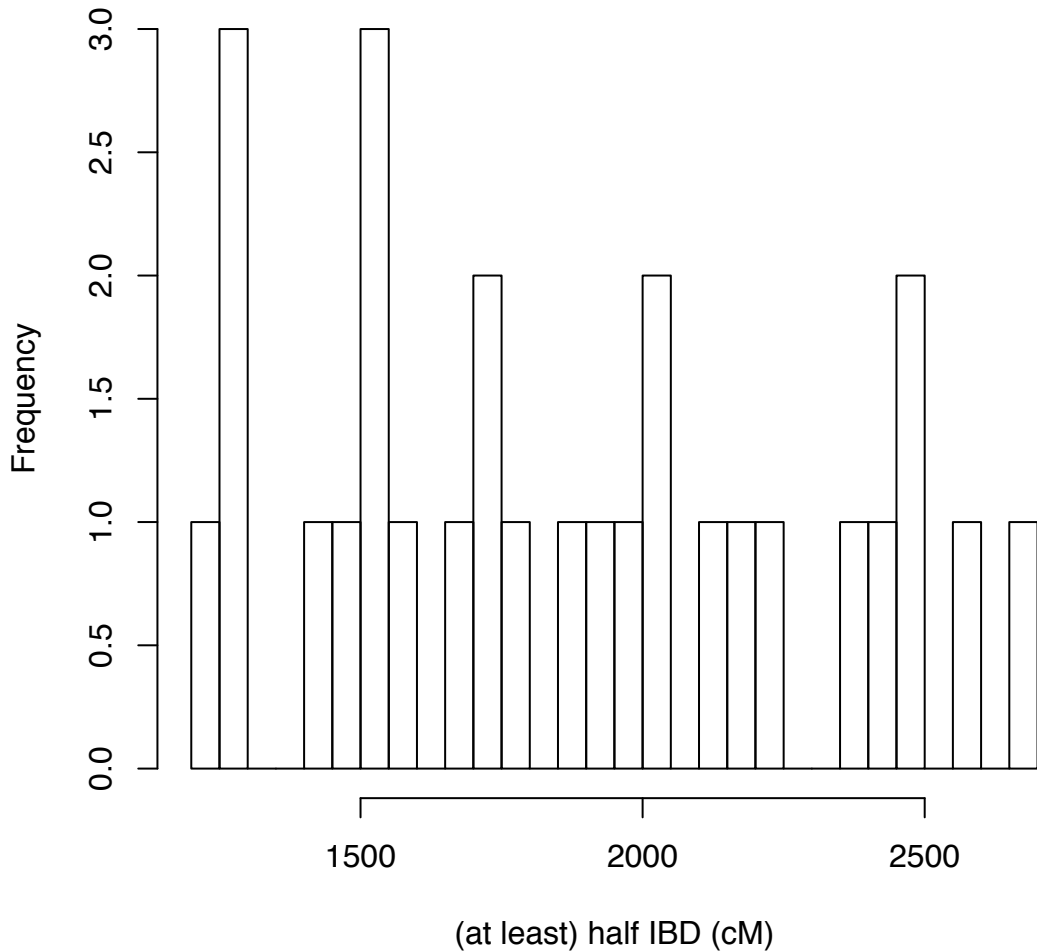

# Maya 99

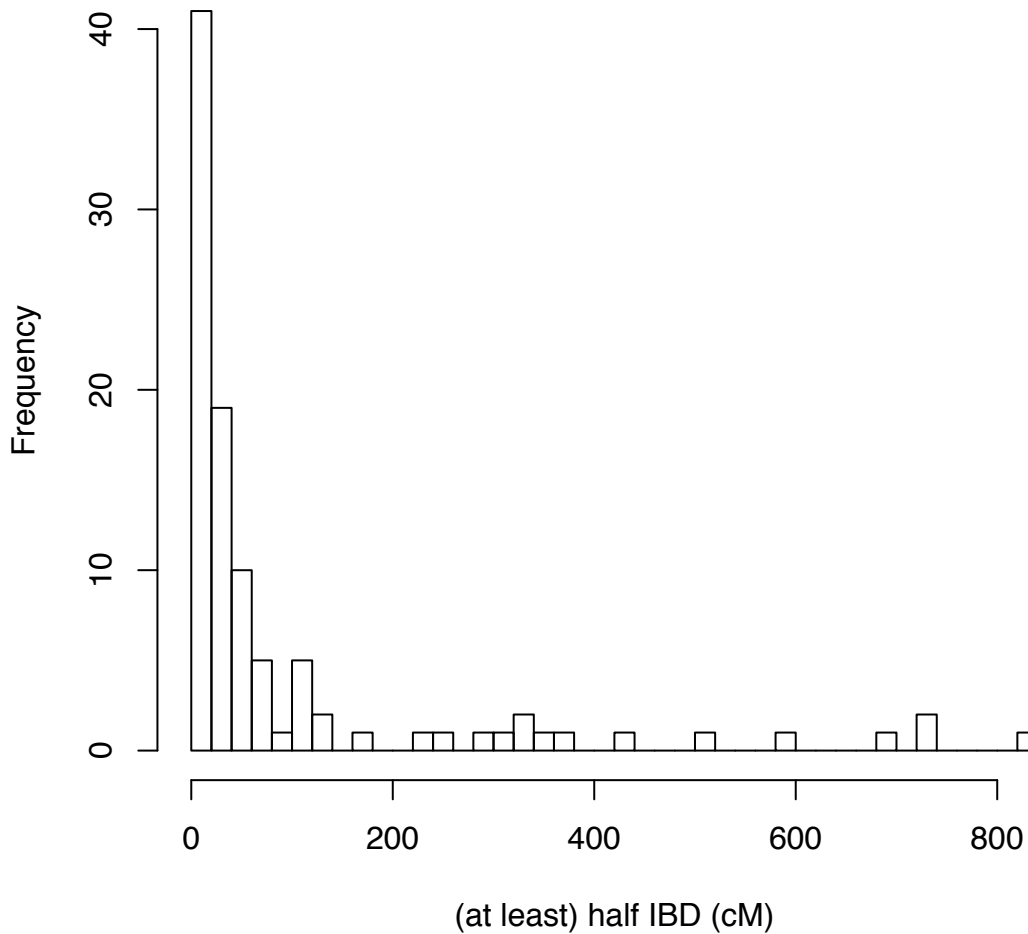

# Russian 97

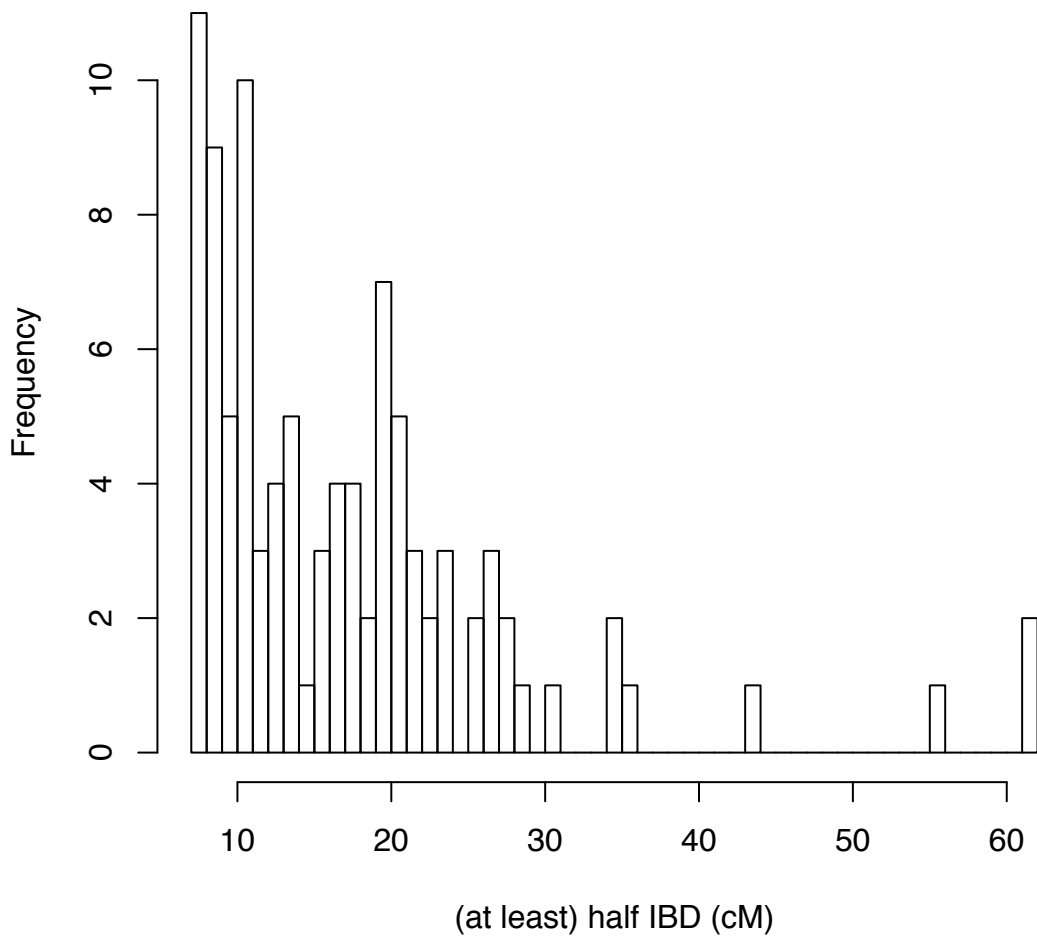



# Mandenka 161

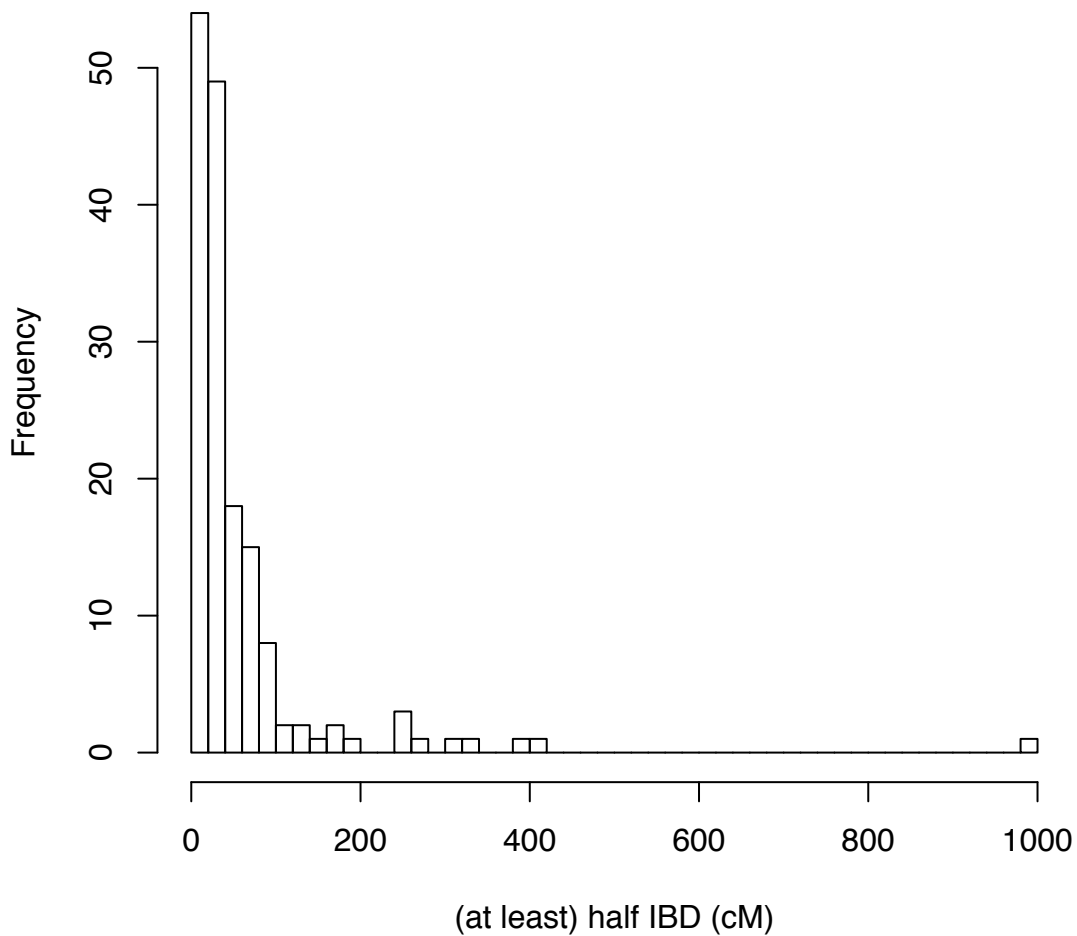

# Yoruba 12

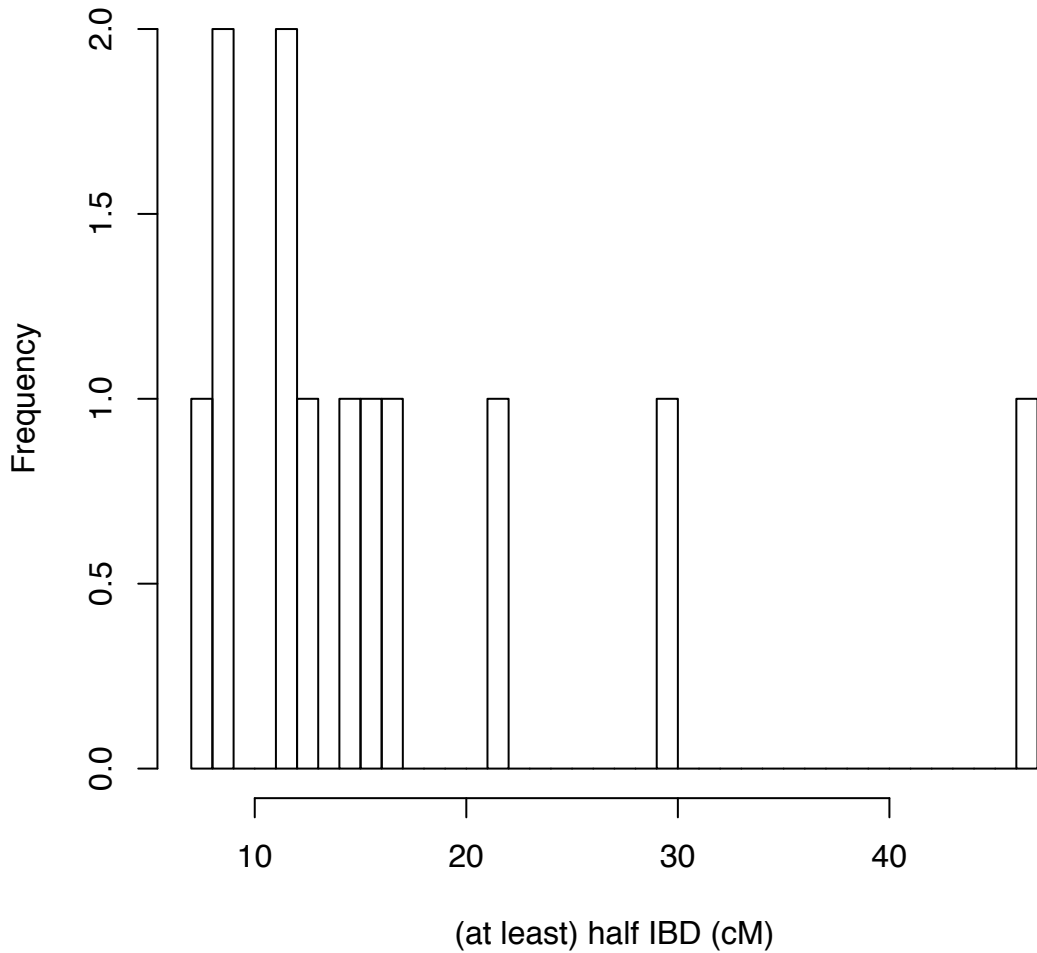

# Yakut 276

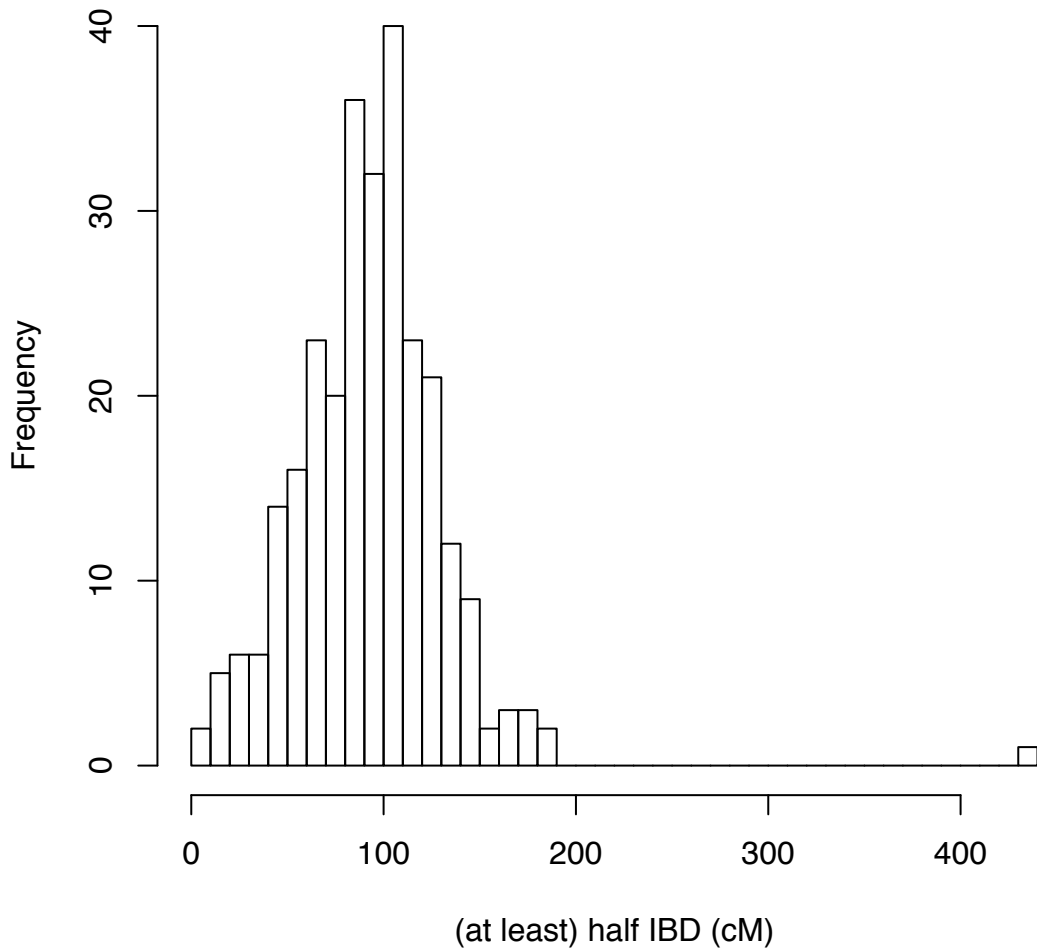

# San 10

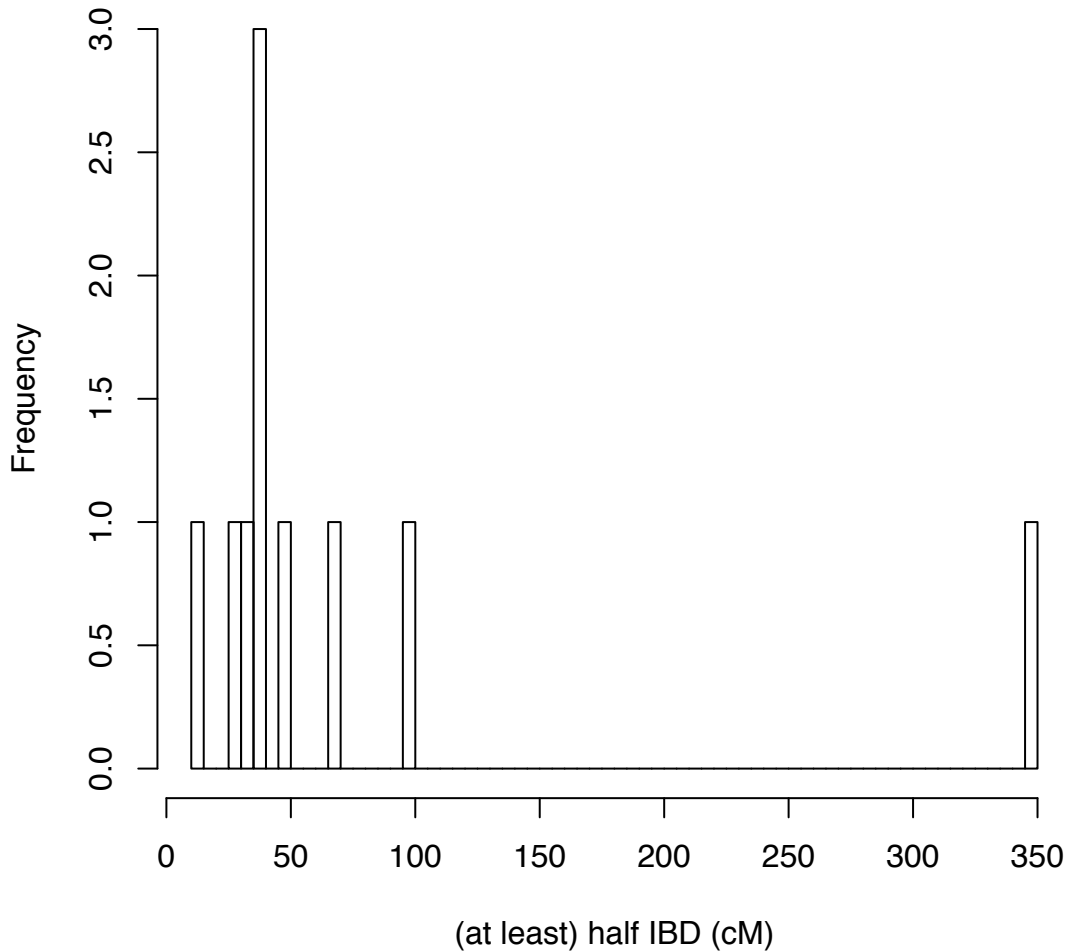

# Karitiana 80

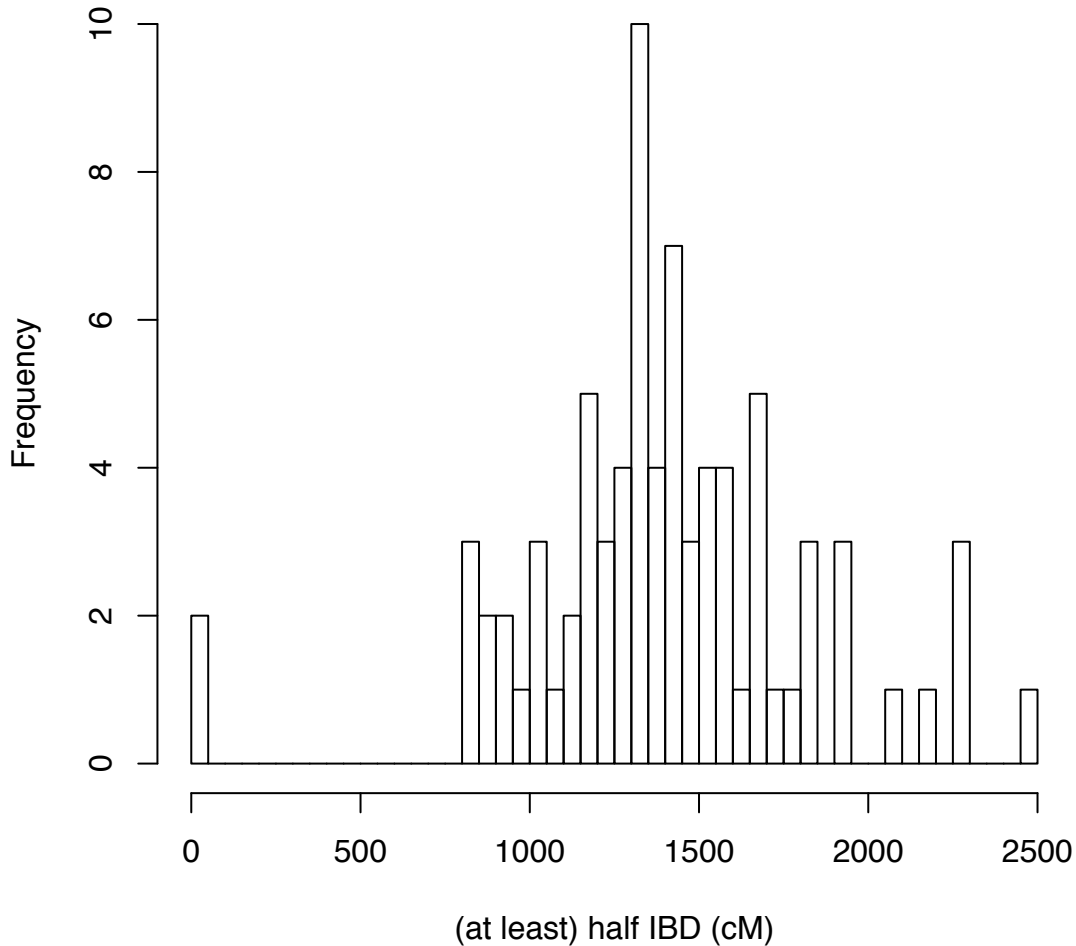

# Bantu S. 1

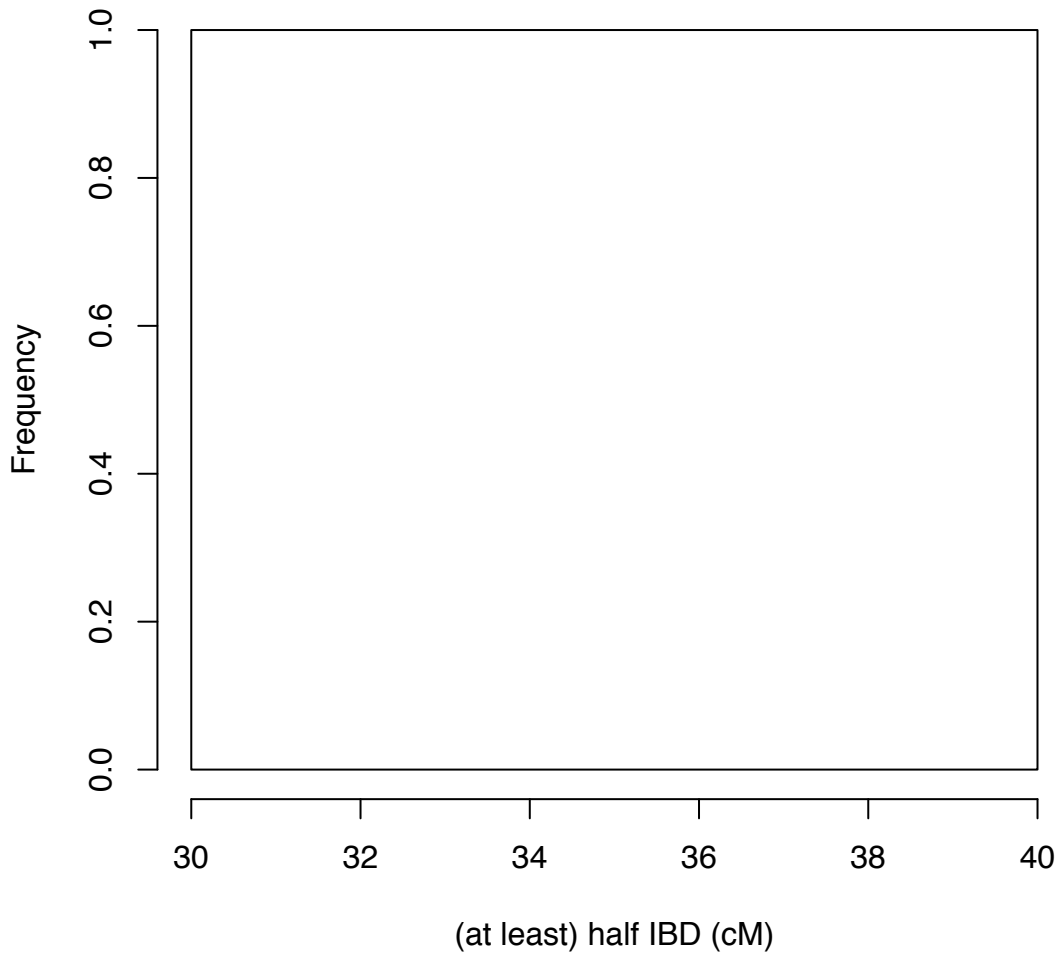

# Pima 91

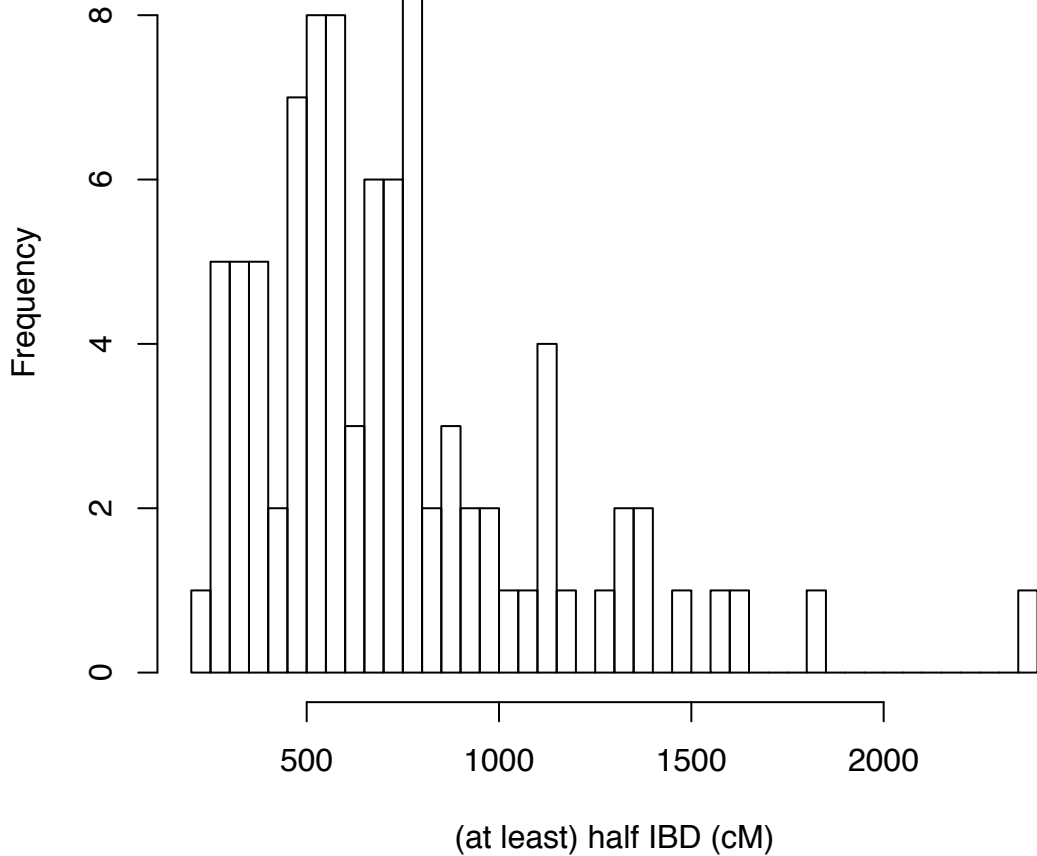

# Tujia 1

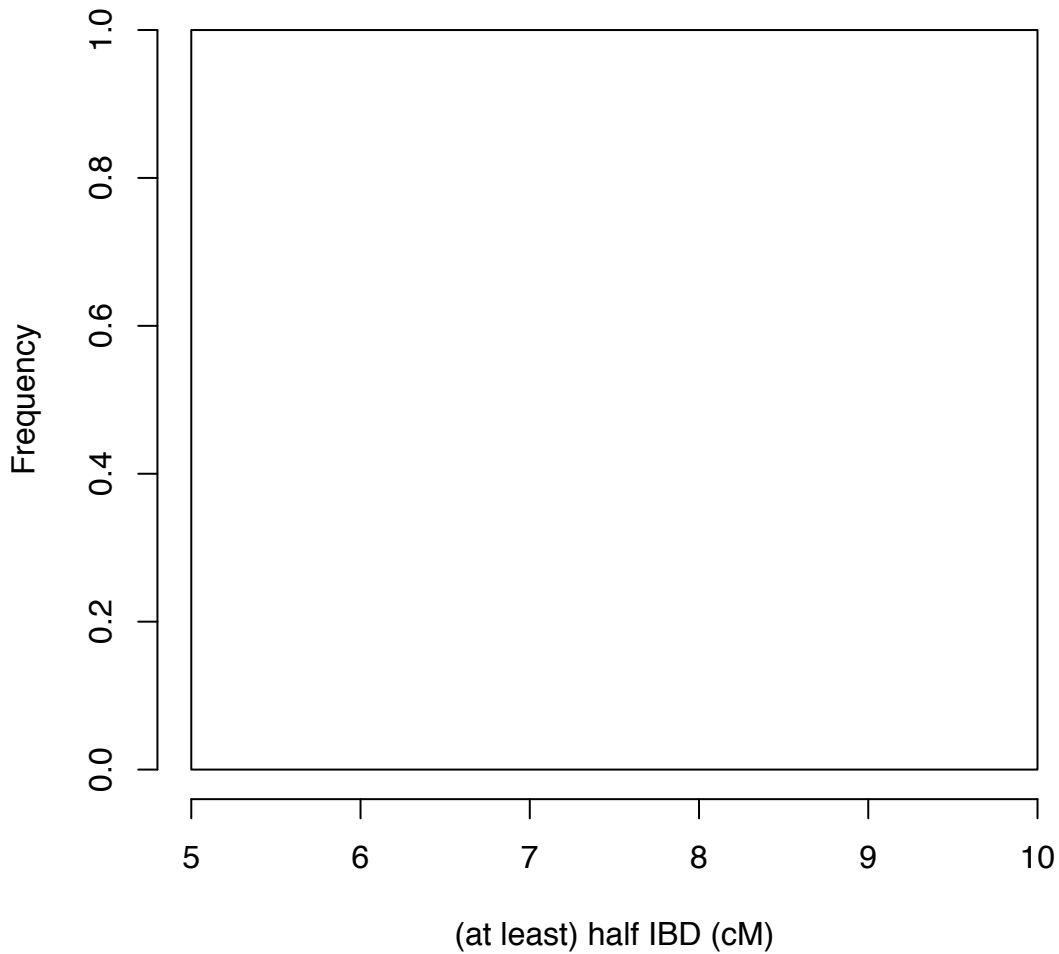



# North Italian 7

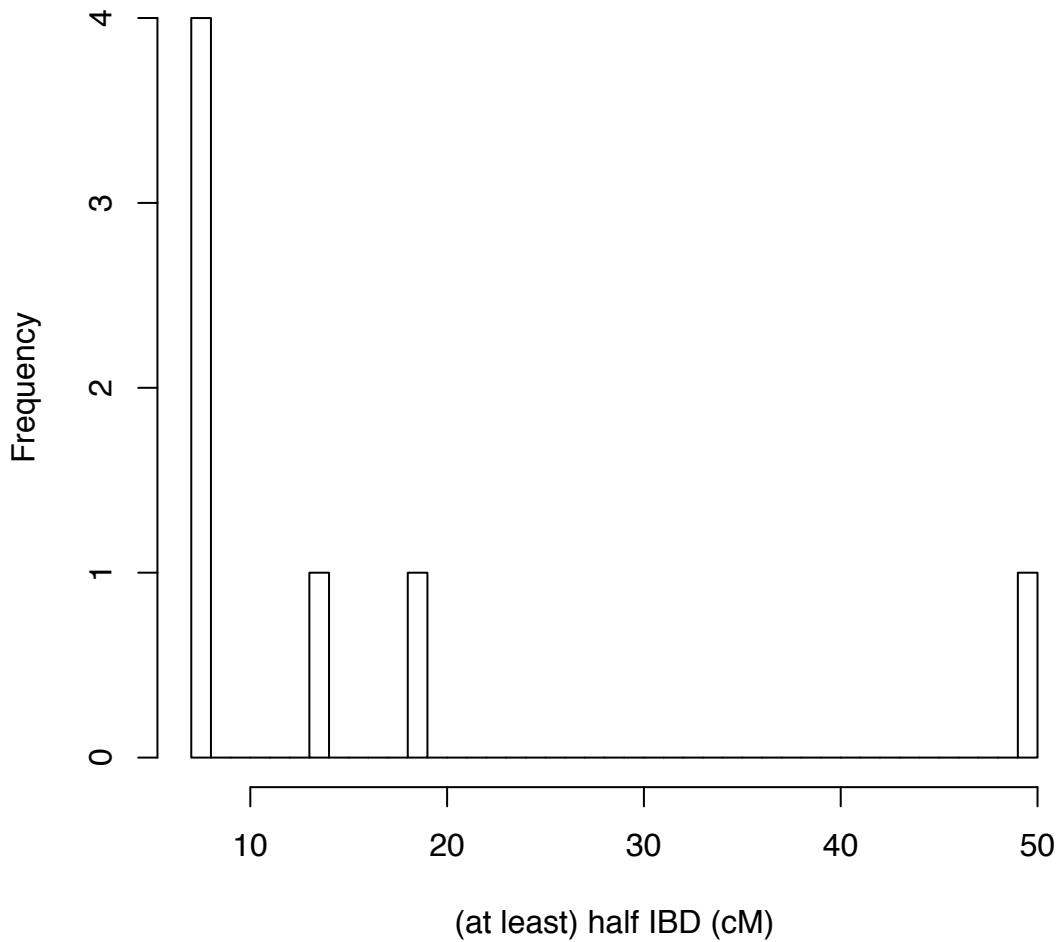

# Tuscan 12

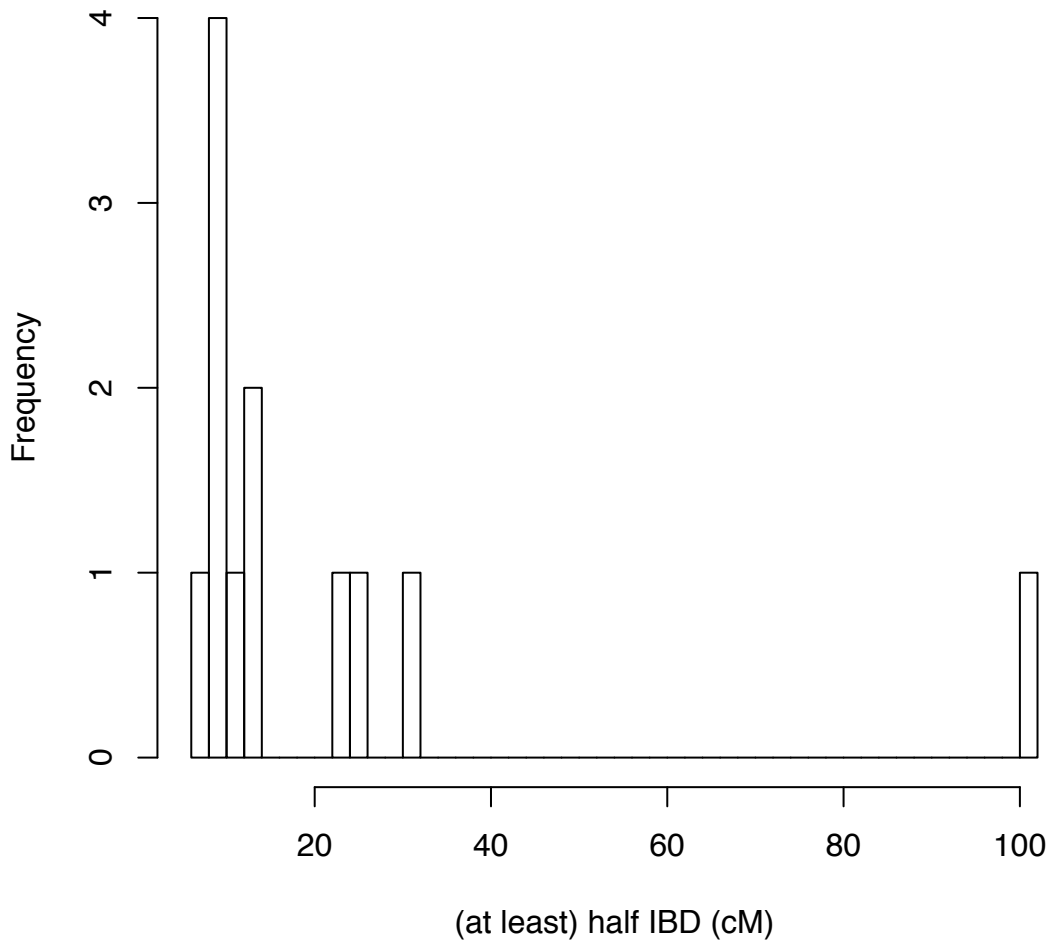

# Yizu 10

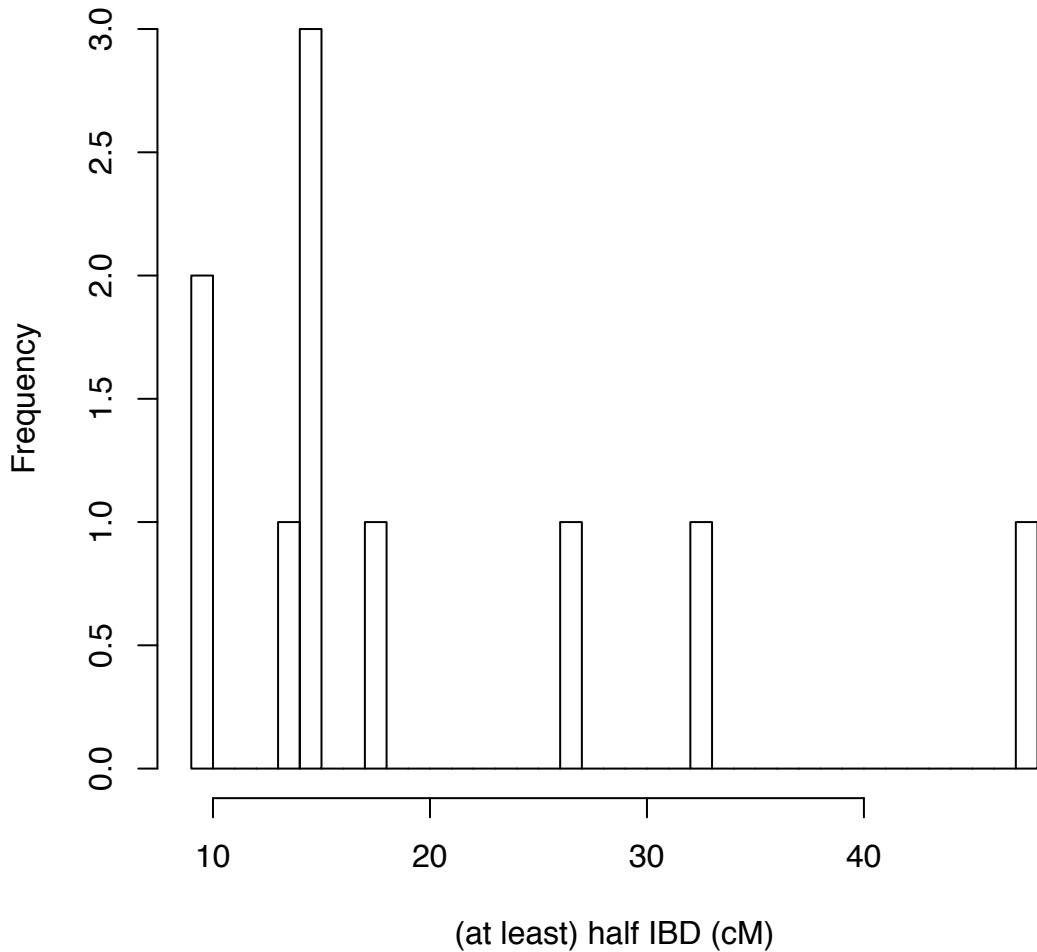

# Miaozu 30

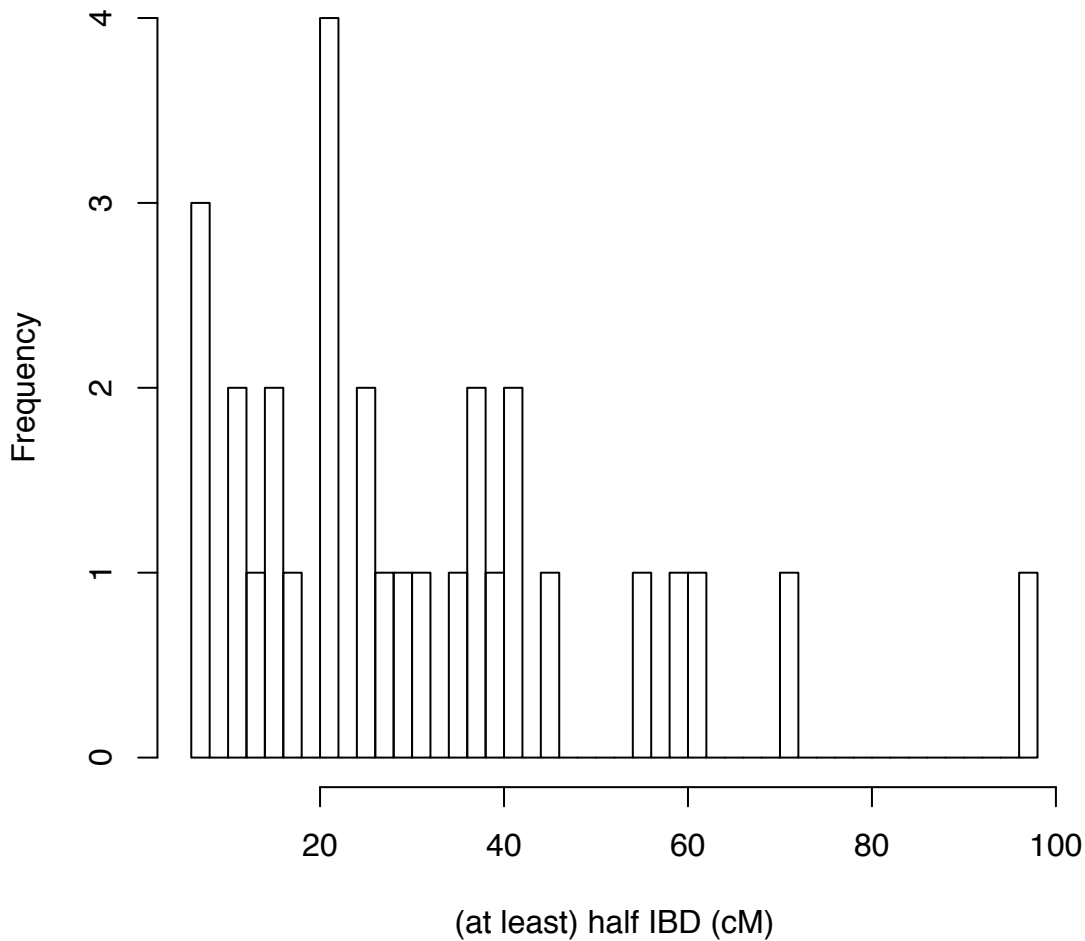

# Oroqen 19

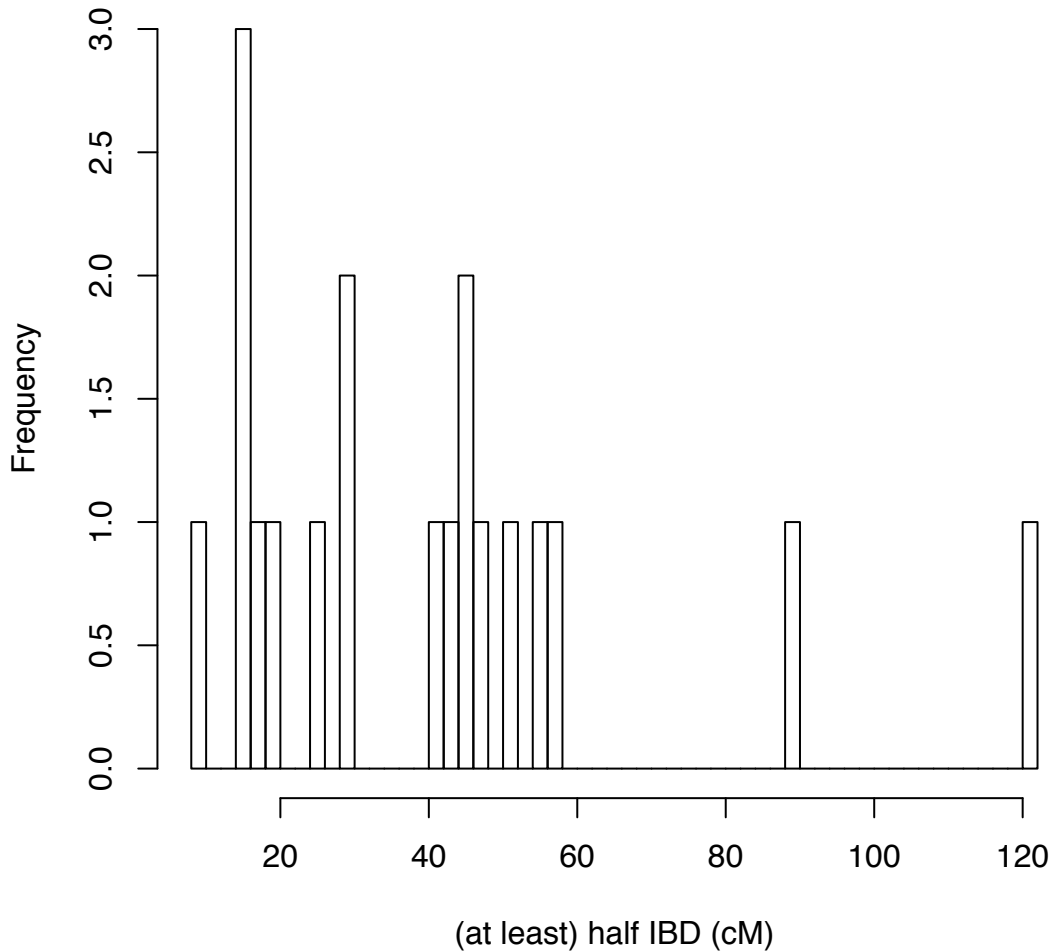

# Daur 26

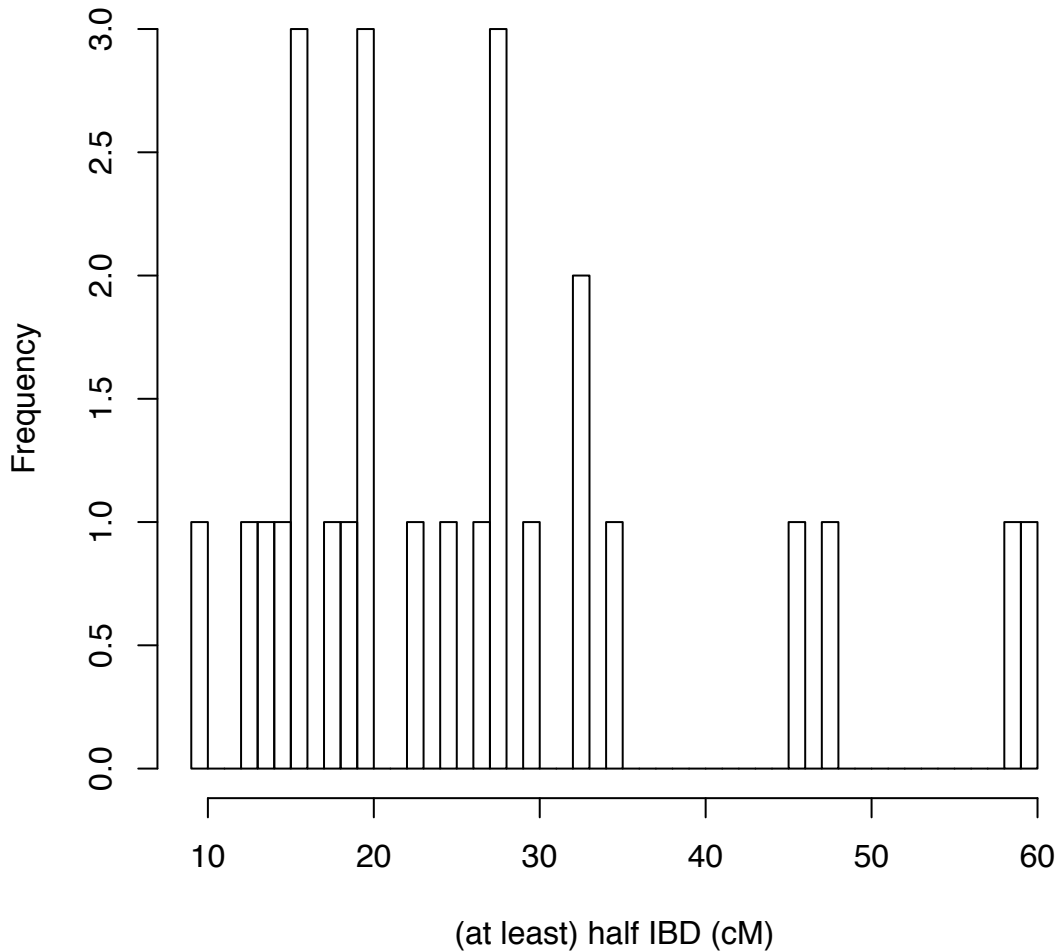

# Mongola 3

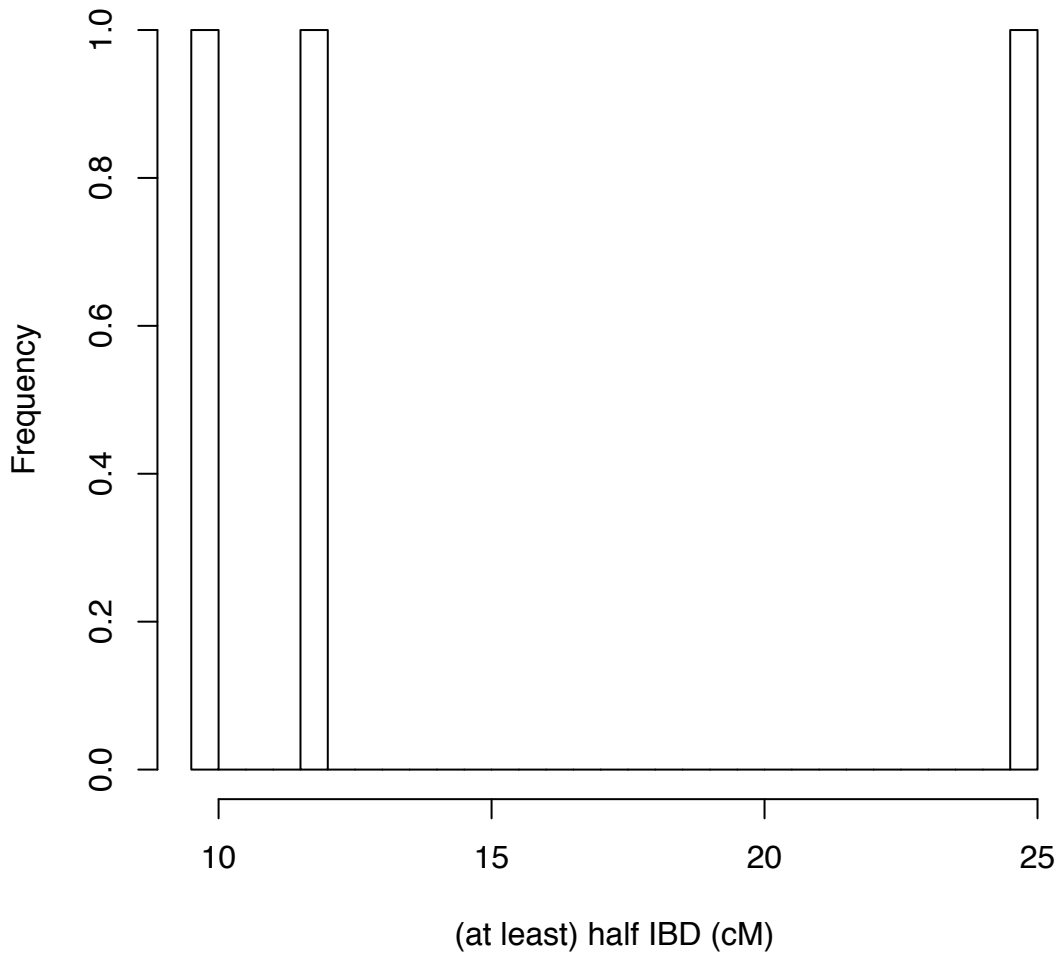

# Hezhen 17

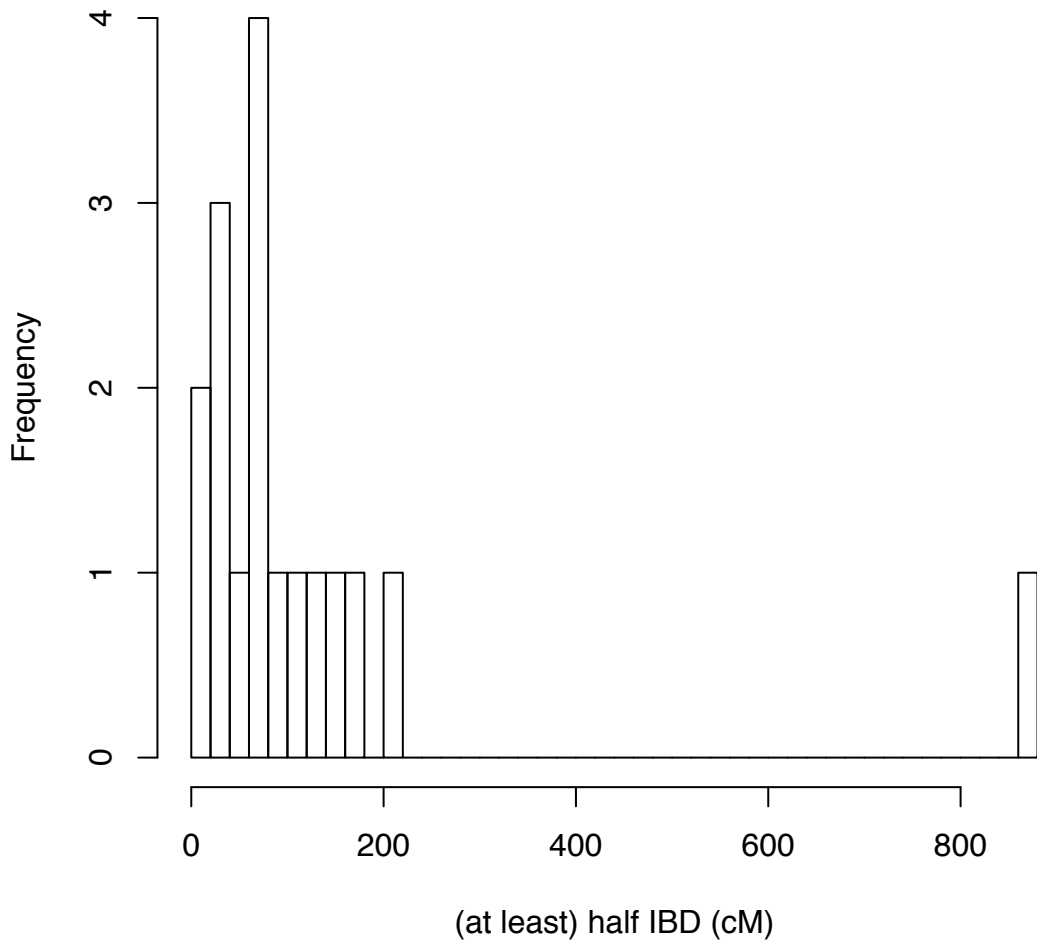



# Xibo 14

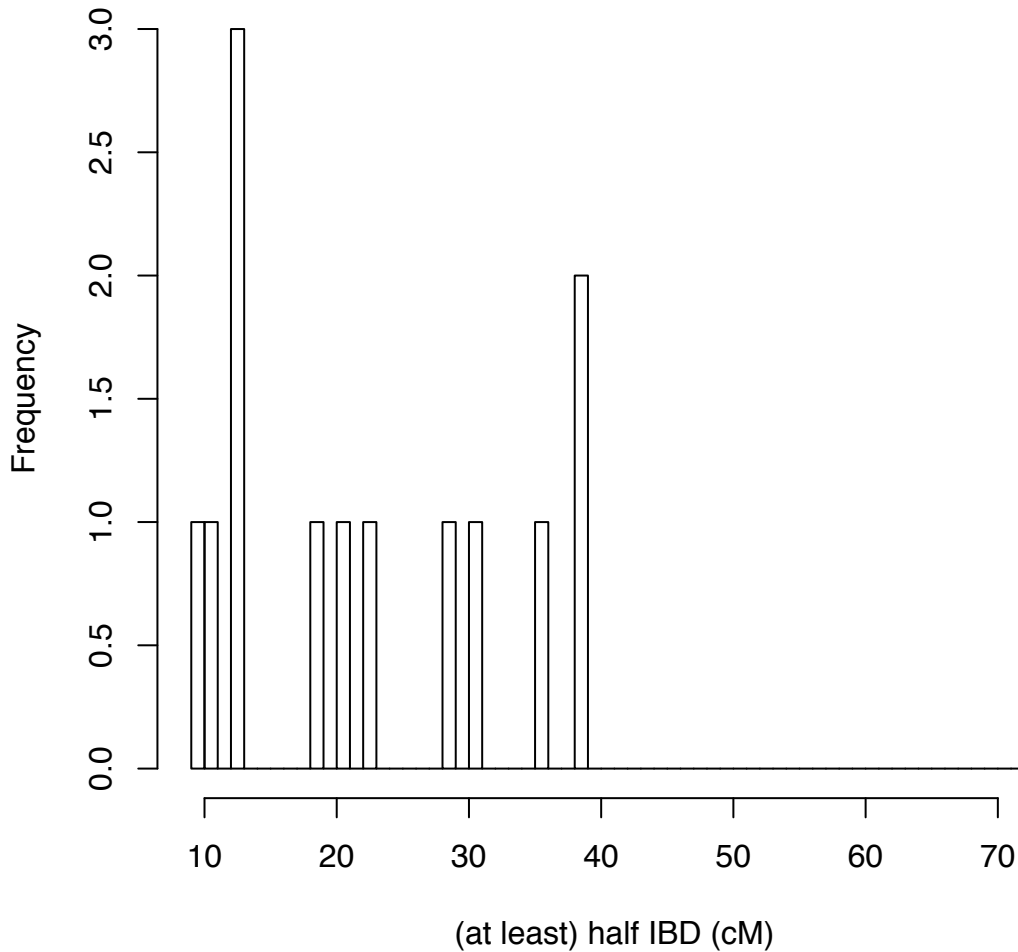

# Mozabite 315

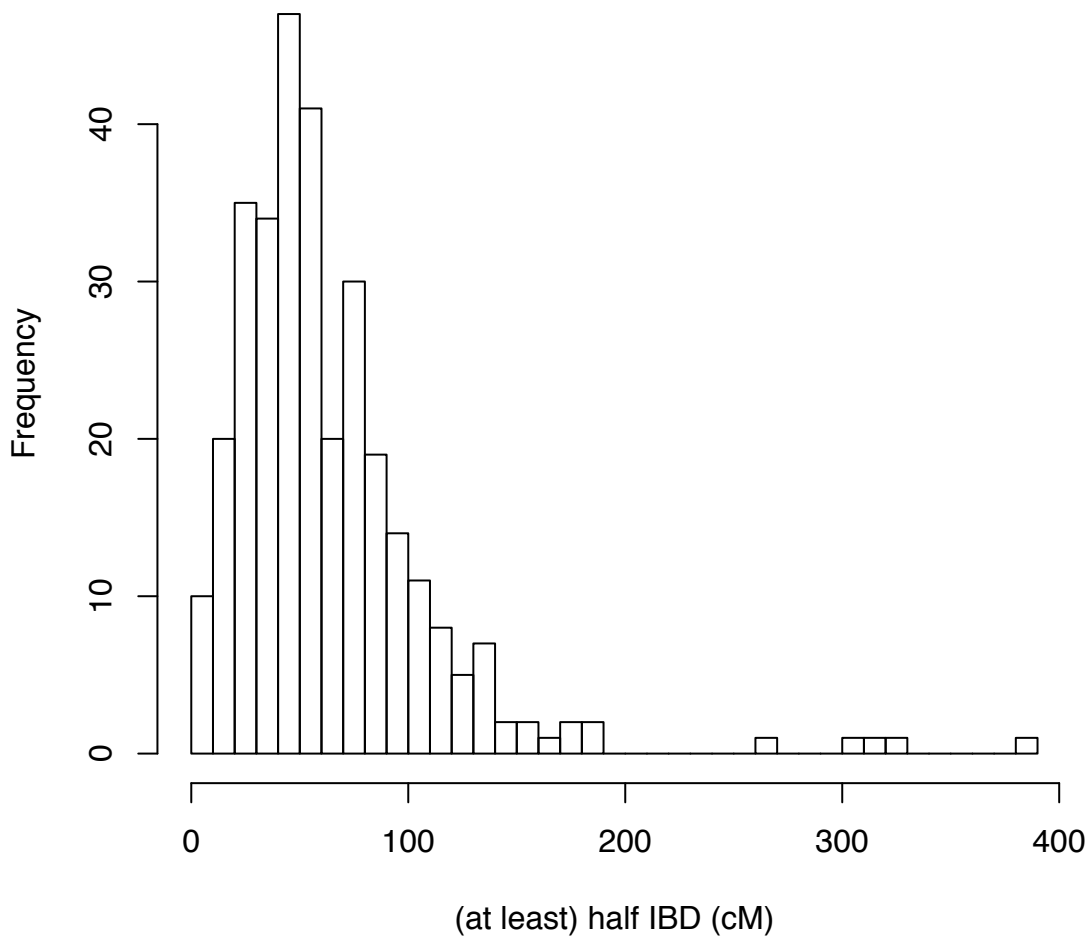

# Uygur 2

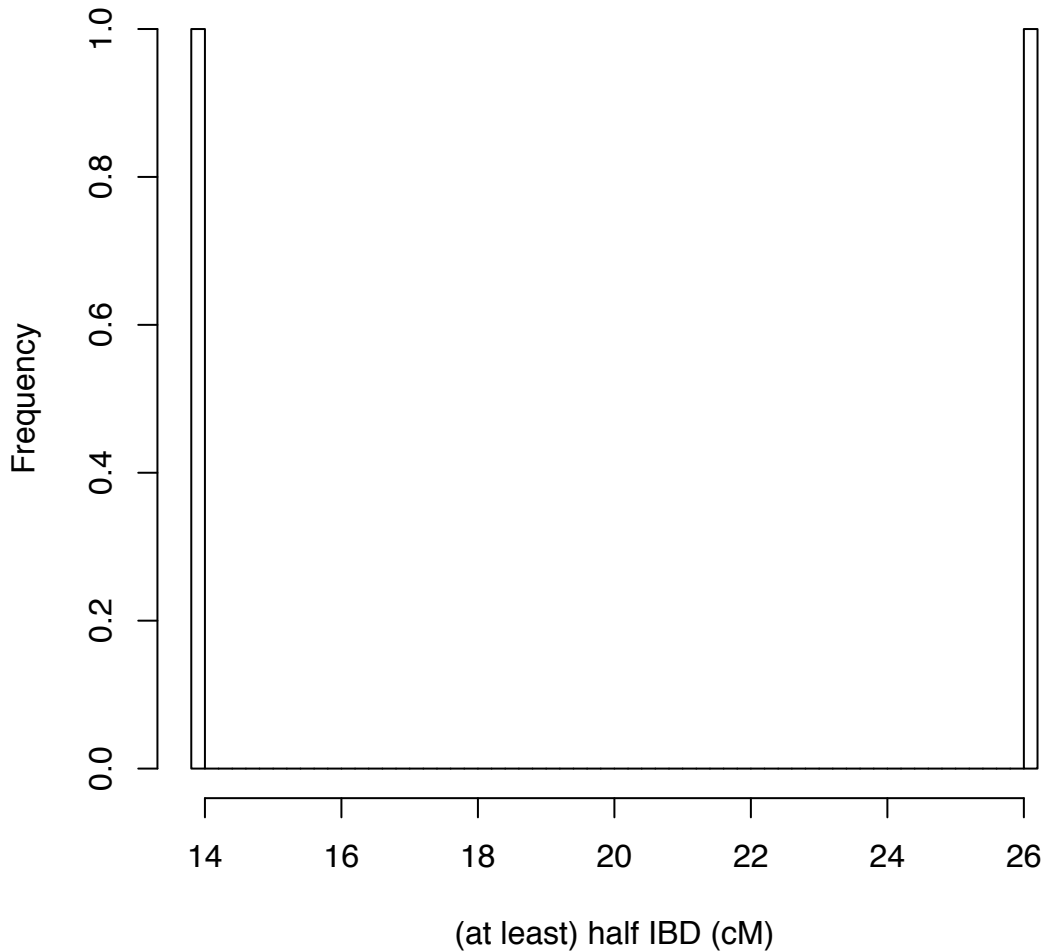

# Dai 20

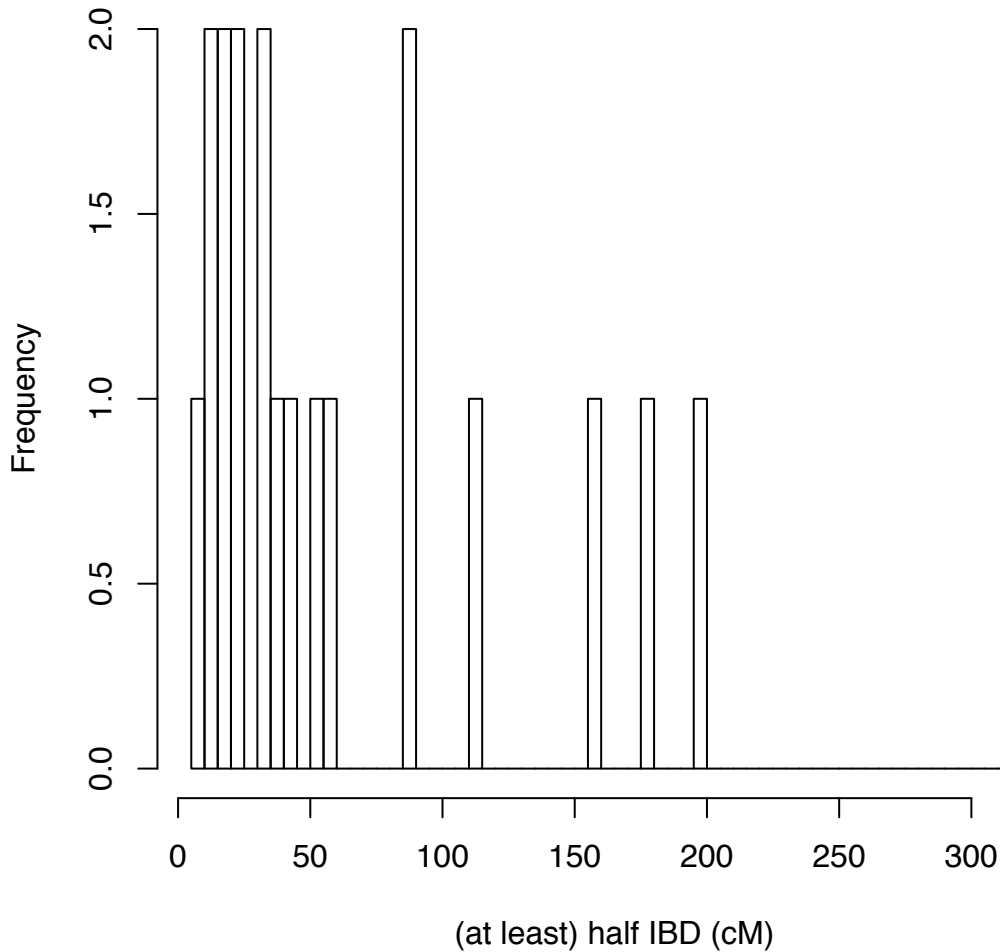

# Lahu 27

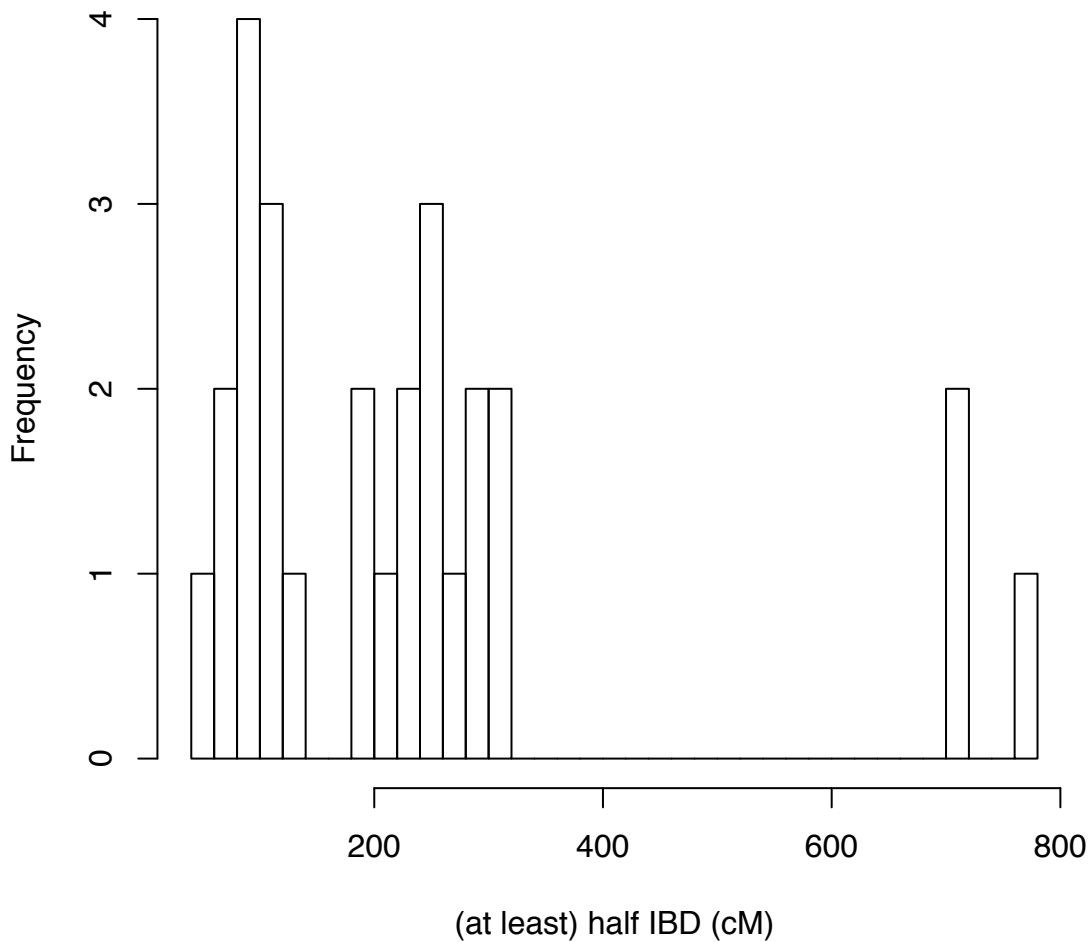

# She 43

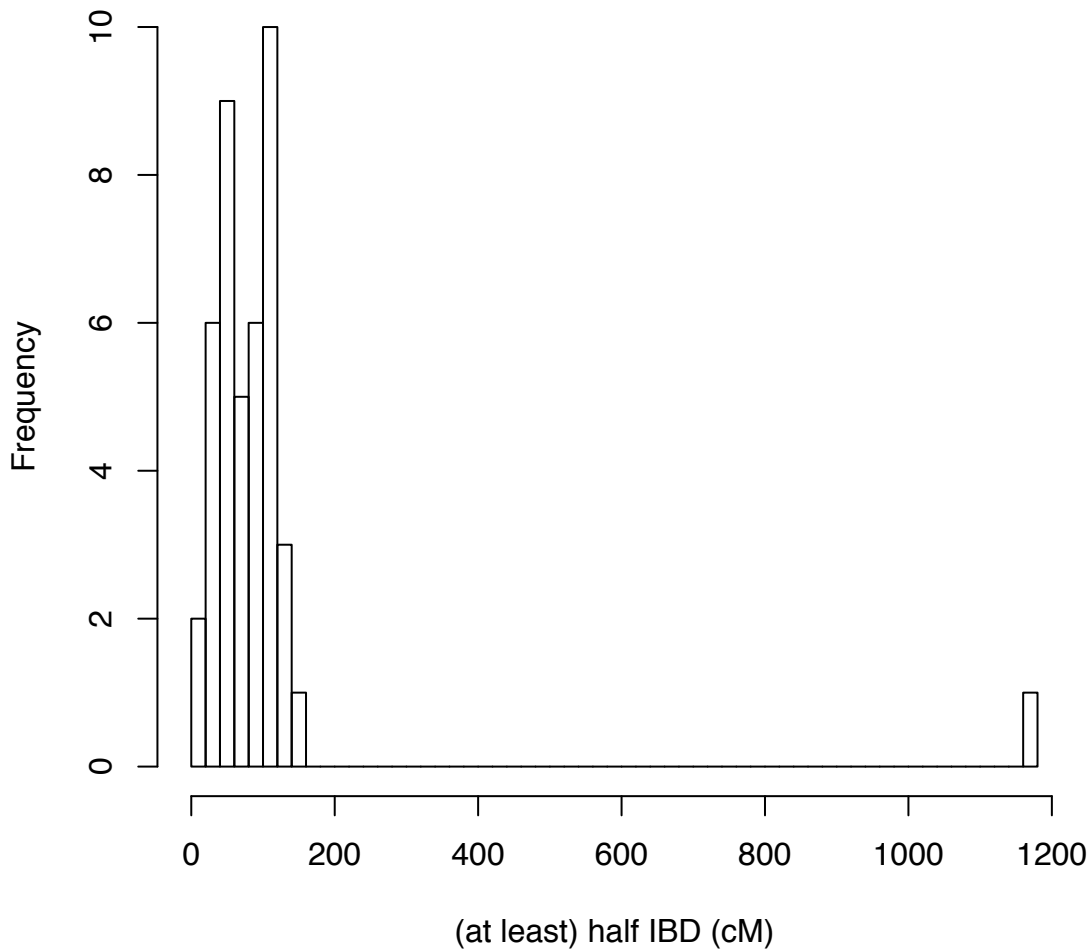

# Naxi 20

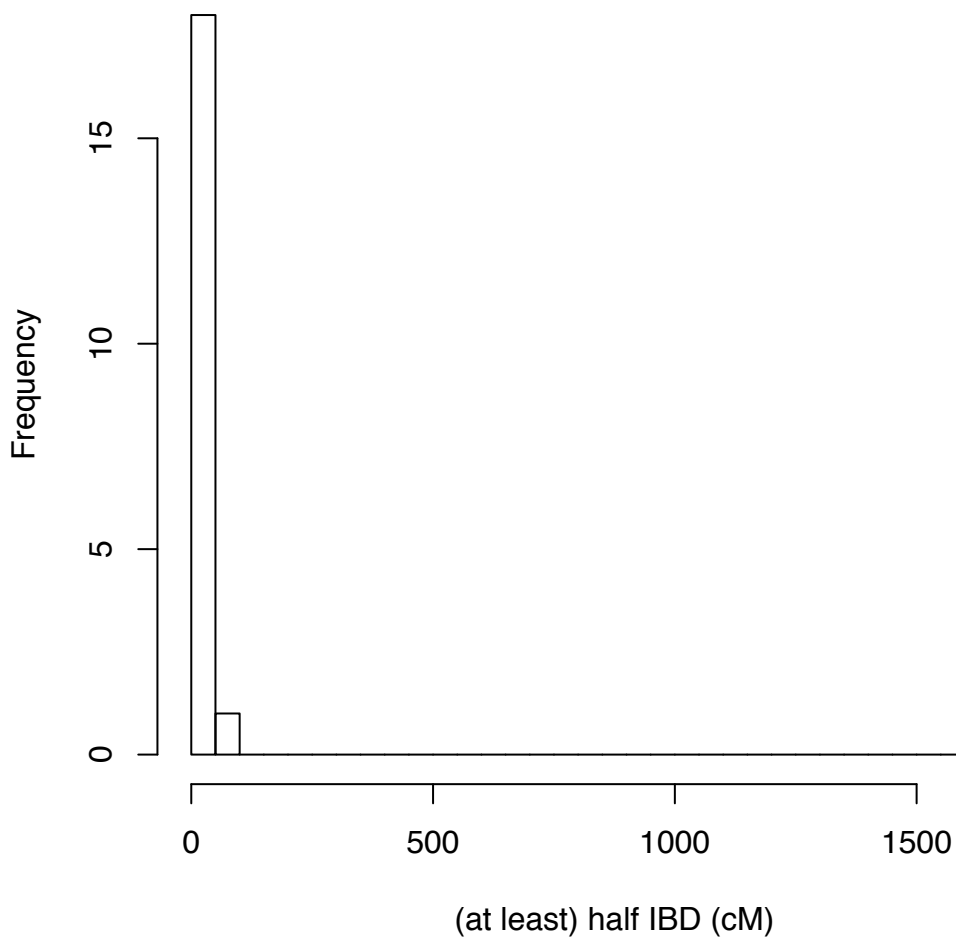

# Tu 11

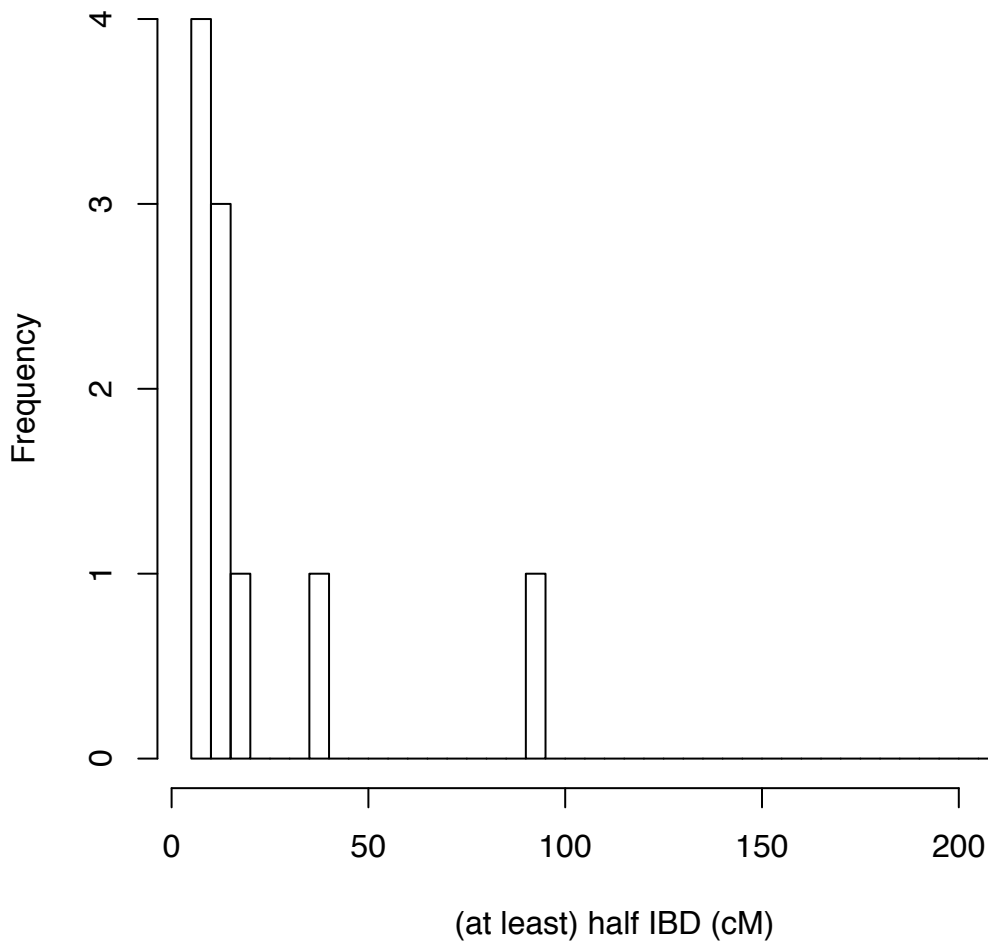



# French Basque 93

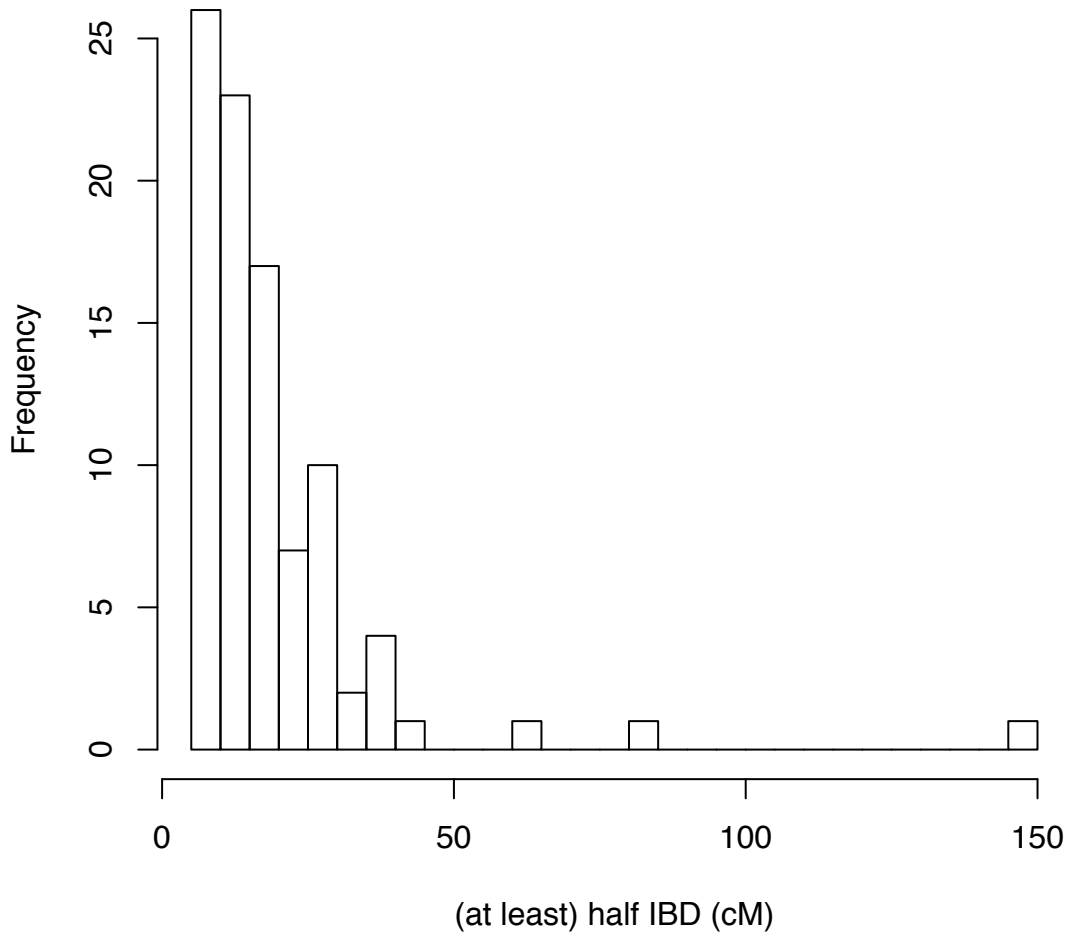

# Adygei 51

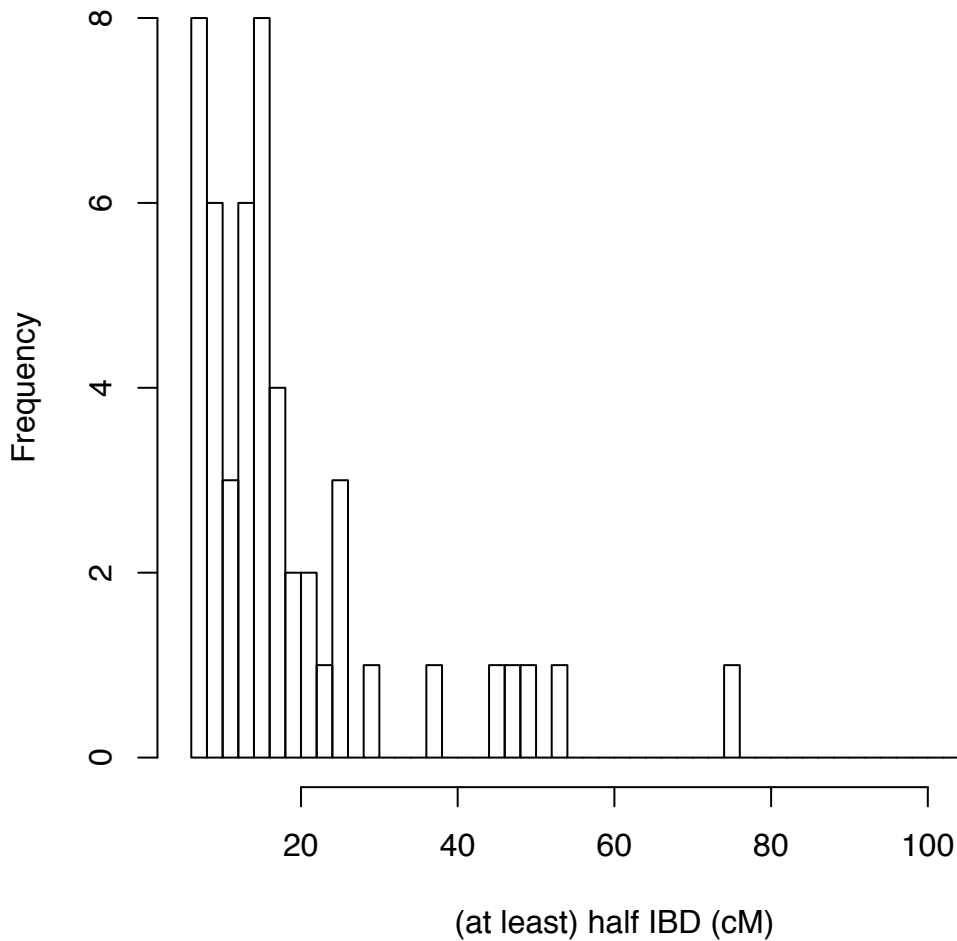

# Bantu N.E. 10

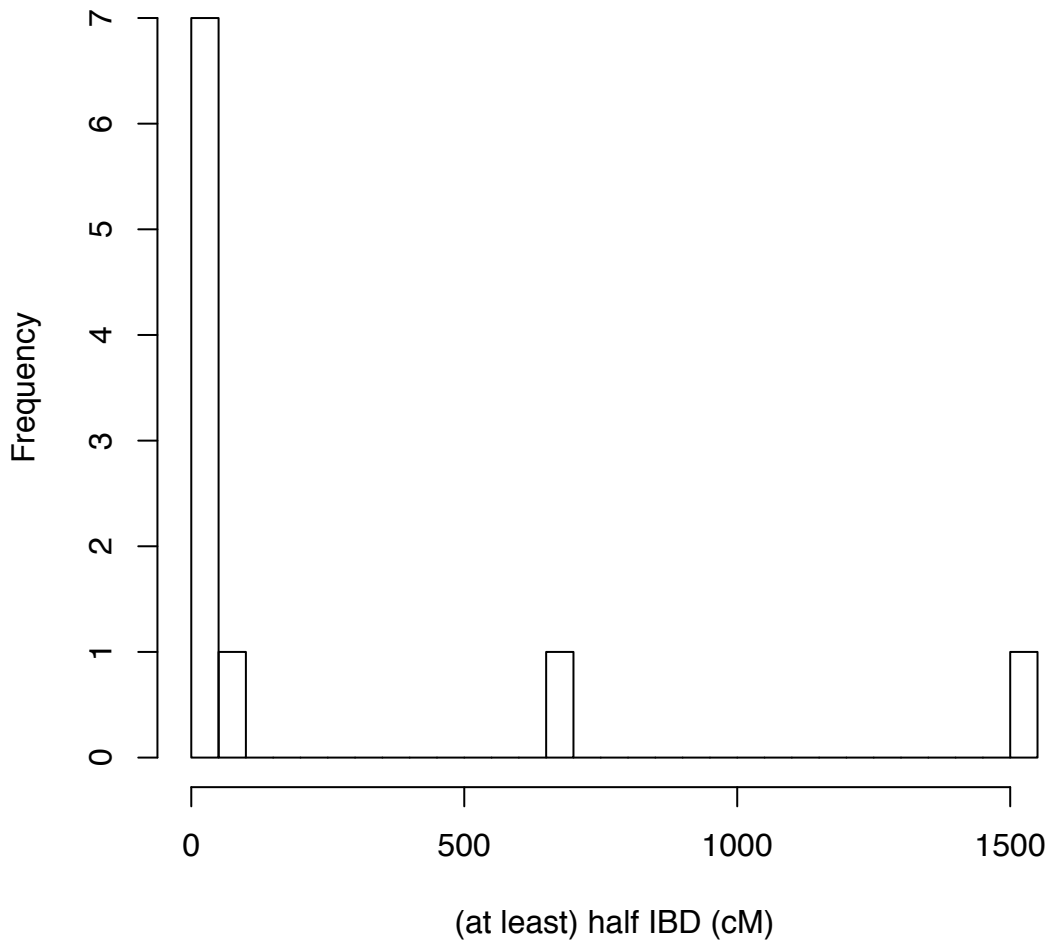

Supplement: pone.0034267.s001.pdf [file pone.0034267.s001.pdf]
